# Supplementary material
Source: PubMed Central journal article supplement (PMC3325679)
Supplement: 1119972109_pnas.201119972SI.pdf [file 1119972109_pnas.201119972SI.pdf]

# Supporting Information

Woo et al. 10.1073/pnas.1119972109

**Table S1. Pairwise amino acid identities of predicted gene products of FmoPV compared with other paramyxoviruses**

|                                     | Percentage of amino acid sequence identity |      |       |      |      |       |      |      |       |      |      |       |      |      |       |      |      |       |
|-------------------------------------|--------------------------------------------|------|-------|------|------|-------|------|------|-------|------|------|-------|------|------|-------|------|------|-------|
|                                     | N                                          |      |       | P    |      |       | M    |      |       | F    |      |       | A    |      |       | L    |      |       |
|                                     | 761U                                       | 776U | M252A | 761U | 776U | M252A | 761U | 776U | M252A | 761U | 776U | M252A | 761U | 776U | M252A | 761U | 776U | M252A |
| <i>Paramyxovirus</i>                | 761U                                       | 776U | M252A | 761U | 776U | M252A | 761U | 776U | M252A | 761U | 776U | M252A | 761U | 776U | M252A | 761U | 776U | M252A |
| <i>Morbillivirus</i>                |                                            |      |       |      |      |       |      |      |       |      |      |       |      |      |       |      |      |       |
| FmoPV 761U                          | —                                          | 99.2 | 96.0  | —    | 97.4 | 89.2  | —    | 98.8 | 95.8  | —    | 98.9 | 96.3  | —    | 99.0 | 96.3  | —    | 99.4 | 97.0  |
| FmoPV 776U                          | 99.2                                       | —    | 96.1  | 97.4 | —    | 88.6  | 98.8 | —    | 96.4  | 98.9 | —    | 95.9  | 99.0 | —    | 95.3  | 99.4 | —    | 97.3  |
| FmoPV M252A                         | 96.0                                       | 96.1 | —     | 89.2 | 88.6 | —     | 95.8 | 96.4 | —     | 96.3 | 95.9 | —     | 96.3 | 95.3 | —     | 97.0 | 97.3 | —     |
| CdIPV                               | 56.8                                       | 56.5 | 56.2  | 29.7 | 29.3 | 27.5  | 58.8 | 58.5 | 58.8  | 36.0 | 35.8 | 36.1  | 20.4 | 20.6 | 20.6  | 55.5 | 55.4 | 55.4  |
| DmoPV                               | 54.5                                       | 54.3 | 55.0  | 26.4 | 25.8 | 25.6  | 59.3 | 59.6 | 59.5  | 43.0 | 42.2 | 42.4  | 24.1 | 24.1 | 23.9  | 56.4 | 56.4 | 56.5  |
| MeaPV                               | 55.4                                       | 55.2 | 54.6  | 29.0 | 28.8 | 27.8  | 60.0 | 59.7 | 59.0  | 44.0 | 44.0 | 43.9  | 20.7 | 20.9 | 20.7  | 56.0 | 55.9 | 55.8  |
| PprPV                               | 55.6                                       | 55.8 | 55.8  | 31.6 | 31.7 | 31.6  | 58.2 | 58.5 | 58.8  | 42.8 | 42.8 | 43.2  | 21.6 | 21.8 | 21.6  | 57.3 | 57.3 | 57.2  |
| RinPV                               | 55.5                                       | 55.5 | 55.6  | 28.4 | 28.4 | 26.8  | 59.5 | 59.2 | 58.2  | 44.6 | 44.3 | 45.1  | 21   | 21.1 | 22.4  | 55.4 | 55.3 | 55.2  |
| PdIPV                               | 56.6                                       | 56.2 | 56.2  | 30.6 | 30.4 | 28.8  | 57.9 | 57.9 | 57.6  | 42.7 | 42.9 | 42.9  | 20.6 | 20.8 | 20.9  | 55.4 | 55.4 | 55.7  |
| <i>Avulavirus</i>                   |                                            |      |       |      |      |       |      |      |       |      |      |       |      |      |       |      |      |       |
| AviPV-6                             | 29.1                                       | 29.3 | 28.1  | 18.3 | 17.9 | 18.6  | 23.5 | 23.5 | 22.9  | 26.8 | 27.0 | 26.6  | 17.7 | 17.6 | 17.3  | 28.5 | 28.6 | 29.1  |
| NdiPV                               | 27.1                                       | 27.1 | 28.0  | 19.8 | 18.8 | 18.1  | 19.5 | 20.0 | 20.9  | 25.8 | 25.8 | 25.4  | 17.5 | 17.2 | 16.2  | 27.7 | 27.5 | 27.6  |
| <i>Henipavirus</i>                  |                                            |      |       |      |      |       |      |      |       |      |      |       |      |      |       |      |      |       |
| HenPV                               | 33.6                                       | 33.2 | 32.8  | 21.1 | 22.2 | 23.3  | 43.9 | 44.2 | 44.2  | 32.4 | 32.6 | 33.0  | 17.8 | 17.8 | 18.9  | 43.4 | 43.4 | 43.4  |
| NipPV                               | 33.8                                       | 33.4 | 33.0  | 22.4 | 21.8 | 22.8  | 43.1 | 43.3 | 43.4  | 33.0 | 33.2 | 33.3  | 18.2 | 18.2 | 18.9  | 44.9 | 44.8 | 45.2  |
| <i>Respirovirus</i>                 |                                            |      |       |      |      |       |      |      |       |      |      |       |      |      |       |      |      |       |
| BpiPV-3                             | 25.7                                       | 25.9 | 25.4  | 18.0 | 18.7 | 19.2  | 33.9 | 33.6 | 34.2  | 28.5 | 28.2 | 28.5  | 18.9 | 18.9 | 18.2  | 38.4 | 38.6 | 38.9  |
| SenPV                               | 24.2                                       | 25.2 | 25.0  | 19.0 | 18.5 | 20.5  | 34.7 | 34.7 | 34.4  | 27.1 | 26.5 | 26.5  | 20.5 | 20.3 | 21.1  | 39.1 | 39.3 | 39.4  |
| <i>Rubulavirus</i>                  |                                            |      |       |      |      |       |      |      |       |      |      |       |      |      |       |      |      |       |
| HpiPV-2                             | 27.5                                       | 27.7 | 27.9  | 19.4 | 19.6 | 16.8  | 22.8 | 23.1 | 21.8  | 25.0 | 24.4 | 25.0  | 18.0 | 18.0 | 18.3  | 30.4 | 30.2 | 30.2  |
| MumPV                               | 27.6                                       | 27.8 | 27.7  | 19.6 | 19.9 | 17.2  | 20.4 | 20.0 | 20.7  | 26.4 | 26.2 | 25.7  | 18.1 | 17.8 | 18.7  | 30.0 | 30.1 | 29.9  |
| <i>Unclassified Paramyxovirinae</i> |                                            |      |       |      |      |       |      |      |       |      |      |       |      |      |       |      |      |       |
| AsaPV                               | 29.8                                       | 29.8 | 28.4  | 16.4 | 17.2 | 17.1  | 34.7 | 34.7 | 34.7  | 30.9 | 30.6 | 30.8  | 20.1 | 20.1 | 19.0  | 40.0 | 40.1 | 40.4  |
| TimPV                               | 35.7                                       | 36.4 | 36.0  | 22.7 | 22.7 | 23.0  | 48.0 | 48.3 | 48.8  | 32.7 | 32.9 | 33.0  | 16.1 | 15.8 | 16.6  | 46.4 | 46.4 | 46.4  |
| BeiPV                               | 36.6                                       | 36.2 | 36.3  | 23.5 | 23.3 | 23.9  | 47.4 | 47.7 | 48.5  | 32.9 | 32.7 | 32.7  | 16.1 | 15.8 | 15.8  | 46.3 | 46.3 | 46.6  |
| FolIPV                              | 28.4                                       | 28.4 | 28.5  | 19.9 | 21.1 | 20.8  | 34.9 | 34.5 | 33.9  | 29.0 | 29.2 | 29.7  | 19.9 | 19.9 | 19.2  | 40.0 | 40.0 | 39.7  |
| JPV                                 | 34.0                                       | 34.0 | 34.0  | 23.1 | 23.3 | 22.3  | 47.8 | 48.1 | 48.4  | 31.8 | 31.8 | 32.9  | 14.8 | 15.0 | 14.4  | 46.9 | 46.9 | 47.2  |
| MosPV                               | 38.6                                       | 38.6 | 37.6  | 22.9 | 22.9 | 22.0  | 47.5 | 48.2 | 46.9  | 36.3 | 36.3 | 35.8  | 19.0 | 19.2 | 19.9  | 48.6 | 48.8 | 48.8  |
| TupPV                               | 33.4                                       | 32.7 | 32.1  | 23.2 | 23.2 | 23.9  | 43.9 | 43.2 | 42.5  | 35.0 | 35.4 | 35.0  | 14.7 | 14.4 | 15.6  | 47.3 | 47.2 | 47.1  |
| NarPV                               | 37.2                                       | 36.9 | 38.1  | 22.7 | 23.8 | 22.6  | 51.5 | 51.5 | 50.6  | 33.0 | 32.5 | 32.6  | 18.6 | 18.4 | 18.7  | 47.7 | 48.0 | 47.9  |

**Table S2. Molecular features and predicted gene products of FmoPV and other morbilliviruses**

| Virus/gene         | mRNA features, nt |        |       |        |               |                        | Deduced protein |         |       |              |
|--------------------|-------------------|--------|-------|--------|---------------|------------------------|-----------------|---------|-------|--------------|
|                    | Total length      | 5' UTR | ORF   | 3' UTR | Hexamer phase | Intergenic regions, nt | Size, aa        | MW, kDa | pI    | Coding frame |
| <b>FmoPV 761U</b>  |                   |        |       |        |               |                        |                 |         |       |              |
| Leader             | 55                | —      | —     | —      | —             | (TTT)                  | —               | —       | —     | —            |
| N                  | 1,659             | 52     | 1,560 | 47     | 2             | CTT                    | 519             | 57.01   | 5.27  | 3            |
| P/V/C(P)           | 1,637             | 63     | 1,476 | 98     | 2             | CTT                    | 491             | 53.12   | 5.20  | 2            |
| P/V/C(V)           | 1,638             | 63     | 831   | 744    | 2             | CTT                    | 276             | 29.97   | 4.85  | 2            |
| P/V/C(C)           | 1,637             | 94     | 513   | 1,030  | 2             | CTT                    | 170             | 19.90   | 9.69  | 3            |
| M                  | 1,378             | 31     | 1,014 | 333    | 4             | CTA                    | 337             | 38.05   | 9.29  | 2            |
| F                  | 2,191             | 215    | 1,632 | 344    | 5             | CTT                    | 543             | 60.26   | 8.80  | 1            |
| H                  | 1,934             | 30     | 1,788 | 116    | 3             | CTT                    | 595             | 68.11   | 6.25  | 3            |
| L                  | 6,781             | 22     | 6,609 | 150    | 2             | (CTT)                  | 2,202           | 252.87  | 8.32  | 3            |
| Trailer            | 400               | —      | —     | —      | —             | —                      | —               | —       | —     | —            |
| <b>FmoPV 776U</b>  |                   |        |       |        |               |                        |                 |         |       |              |
| Leader             | 55                | —      | —     | —      | —             | (TTT)                  | —               | —       | —     | —            |
| N                  | 1,659             | 52     | 1,560 | 47     | 2             | CTT                    | 519             | 57.06   | 5.15  | 3            |
| P/V/C(P)           | 1,637             | 63     | 1,476 | 98     | 2             | CTT                    | 491             | 53.19   | 5.33  | 2            |
| P/V/C(V)           | 1,638             | 63     | 831   | 744    | 2             | CTT                    | 276             | 29.99   | 4.91  | 2            |
| P/V/C(C)           | 1,637             | 94     | 513   | 1030   | 2             | CTT                    | 170             | 19.87   | 9.69  | 3            |
| M                  | 1,378             | 31     | 1,014 | 333    | 4             | CTA                    | 337             | 38.02   | 9.29  | 2            |
| F                  | 2,191             | 215    | 1,632 | 344    | 5             | CTT                    | 543             | 60.21   | 8.79  | 1            |
| H                  | 1,934             | 30     | 1,788 | 116    | 3             | CTT                    | 595             | 68.24   | 6.03  | 3            |
| L                  | 6,781             | 22     | 6,609 | 150    | 2             | (CTT)                  | 2,202           | 253.01  | 8.23  | 3            |
| Trailer            | 400               | —      | —     | —      | —             | —                      | —               | —       | —     | —            |
| <b>FmoPV M252A</b> |                   |        |       |        |               |                        |                 |         |       |              |
| Leader             | 55                | —      | —     | —      | —             | (TTT)                  | —               | —       | —     | —            |
| N                  | 1,659             | 52     | 1,560 | 47     | 2             | CTT                    | 519             | 57.08   | 5.34  | 3            |
| P/V/C(P)           | 1,637             | 63     | 1,476 | 98     | 2             | CTT                    | 491             | 53.41   | 5.44  | 2            |
| P/V/C(V)           | 1,638             | 63     | 831   | 744    | 2             | CTT                    | 276             | 29.94   | 5.13  | 2            |
| P/V/C(C)           | 1,637             | 94     | 513   | 1030   | 2             | CTT                    | 170             | 19.86   | 9.69  | 3            |
| M                  | 1,378             | 31     | 1,014 | 333    | 4             | CTA                    | 337             | 38.06   | 9.29  | 2            |
| F                  | 2,191             | 215    | 1,632 | 344    | 5             | CTT                    | 543             | 60.19   | 8.80  | 1            |
| H                  | 1,934             | 30     | 1,788 | 116    | 3             | CTT                    | 595             | 68.18   | 6.25  | 3            |
| L                  | 6,781             | 22     | 6,609 | 150    | 2             | (CTT)                  | 2,202           | 252.91  | 8.28  | 3            |
| Trailer            | 400               | —      | —     | —      | —             | —                      | —               | —       | —     | —            |
| <b>MeaPV</b>       |                   |        |       |        |               |                        |                 |         |       |              |
| Leader             | 55                | —      | —     | —      | —             | (CTT)                  | —               | —       | —     | —            |
| N                  | 1,689             | 52     | 1,578 | 59     | 2             | CTT                    | 525             | 58.02   | 5.11  | 3            |
| P/V/C(P)           | 1,655             | 59     | 1,524 | 72     | 2             | CTT                    | 507             | 53.90   | 4.99  | 1            |
| P/V/C(V)           | 1,656             | 59     | 900   | 697    | 2             | CTT                    | 299             | 31.85   | 4.66  | 1            |
| P/V/C(C)           | 1,655             | 81     | 561   | 1013   | 2             | CTT                    | 186             | 21.11   | 10.36 | 2            |
| M                  | 1,466             | 32     | 1,008 | 426    | 4             | CTT                    | 335             | 37.71   | 9.07  | 3            |
| F                  | 2,373             | 583    | 1,653 | 137    | 3             | CTT                    | 550             | 59.53   | 8.78  | 1            |
| H                  | 1,958             | 20     | 1,854 | 84     | 3             | CGT                    | 617             | 69.17   | 7.88  | 2            |
| L                  | 6,643             | 22     | 6,552 | 69     | 2             | (CTT)                  | 2,183           | 247.74  | 8.43  | 3            |
| Trailer            | 40                | —      | —     | —      | —             | —                      | —               | —       | —     | —            |
| <b>CdiPV</b>       |                   |        |       |        |               |                        |                 |         |       |              |
| Leader             | 55                | —      | —     | —      | —             | (CTT)                  | —               | —       | —     | —            |
| N                  | 1,683             | 52     | 1,572 | 59     | 2             | CTT                    | 523             | 58.14   | 5.20  | 3            |
| P/V/C(P)           | 1,655             | 59     | 1,524 | 72     | 2             | CTT                    | 507             | 54.75   | 5.03  | 1            |
| P/V/C(V)           | 1,656             | 59     | 900   | 697    | 2             | CTT                    | 299             | 33.11   | 4.66  | 1            |
| P/V/C(C)           | 1,655             | 81     | 525   | 1049   | 2             | CTT                    | 174             | 20.26   | 10.30 | 2            |
| M                  | 1,447             | 32     | 1,008 | 407    | 4             | CTT                    | 335             | 37.77   | 8.87  | 3            |
| F                  | 2,206             | 85     | 1,989 | 132    | 2             | CTT                    | 662             | 72.95   | 9.18  | 3            |
| H                  | 1,946             | 20     | 1,815 | 111    | 3             | CTA                    | 604             | 67.99   | 6.74  | 2            |
| L                  | 6,642             | 22     | 6,555 | 65     | 2             | (CAA)                  | 2,184           | 248.19  | 8.39  | 3            |
| Trailer            | 41                | —      | —     | —      | —             | —                      | —               | —       | —     | —            |
| <b>DmoPV</b>       |                   |        |       |        |               |                        |                 |         |       |              |
| Leader             | 55                | —      | —     | —      | —             | (CTT)                  | —               | —       | —     | —            |
| N                  | 1,683             | 52     | 1,572 | 59     | 2             | CTT                    | 523             | 57.49   | 5.14  | 3            |
| P/V/C(P)           | 1,655             | 59     | 1,521 | 75     | 2             | CTT                    | 506             | 55.26   | 5.09  | 1            |
| P/V/C(V)           | 1,656             | 59     | 912   | 685    | 2             | CTT                    | 303             | 33.69   | 4.75  | 1            |

Table S2. Cont.

| Virus/gene | mRNA features, nt |        |       |        |               | Deduced protein        |          |         |       |              |
|------------|-------------------|--------|-------|--------|---------------|------------------------|----------|---------|-------|--------------|
|            | Total length      | 5' UTR | ORF   | 3' UTR | Hexamer phase | Intergenic regions, nt | Size, aa | MW, kDa | pI    | Coding frame |
| P/V/C(C)   | 1,655             | 81     | 534   | 1040   | 2             | CTT                    | 177      | 20.41   | 10.19 | 2            |
| M          | 1,453             | 32     | 1,008 | 413    | 4             | CTT                    | 335      | 37.97   | 8.97  | 3            |
| F          | 2,212             | 421    | 1,659 | 132    | 2             | CTT                    | 552      | 59.87   | 8.81  | 3            |
| H          | 1,946             | 20     | 1,815 | 111    | 3             | CTT                    | 604      | 68.04   | 6.18  | 2            |
| L          | 6,643             | 22     | 6,552 | 69     | 2             | (CAA)                  | 2,183    | 248.07  | 8.52  | 3            |
| Trailer    | 40                | —      | —     | —      | —             | —                      | —        | —       | —     | —            |
| PprPV      |                   |        |       |        |               |                        |          |         |       |              |
| Leader     | 55                | —      | —     | —      | —             | (CTT)                  | —        | —       | —     | —            |
| N          | 1,689             | 52     | 1,578 | 59     | 2             | CTT                    | 525      | 57.78   | 5.21  | 3            |
| P/V/C(P)   | 1,655             | 59     | 1,530 | 66     | 2             | CTT                    | 509      | 54.79   | 5.14  | 1            |
| P/V/C(V)   | 1,656             | 59     | 897   | 700    | 2             | CTT                    | 298      | 31.34   | 4.58  | 1            |
| P/V/C(C)   | 1,655             | 81     | 534   | 1040   | 2             | CTT                    | 177      | 19.93   | 9.92  | 2            |
| M          | 1,483             | 32     | 1,008 | 443    | 4             | CTT                    | 335      | 37.95   | 8.97  | 3            |
| F          | 2,411             | 634    | 1,641 | 136    | 2             | CTT                    | 546      | 59.12   | 8.71  | 3            |
| H          | 1,957             | 20     | 1,830 | 107    | 4             | CTT                    | 609      | 68.76   | 6.64  | 3            |
| L          | 6,643             | 22     | 6,552 | 69     | 2             | (CTA)                  | 2,183    | 247.27  | 7.73  | 3            |
| Trailer    | 40                | —      | —     | —      | —             | —                      | —        | —       | —     | —            |
| RinPV      |                   |        |       |        |               |                        |          |         |       |              |
| Leader     | 55                | —      | —     | —      | —             | (CTT)                  | —        | —       | —     | —            |
| N          | 1,689             | 52     | 1,578 | 59     | 2             | CTT                    | 525      | 58.04   | 5.08  | 3            |
| P/V/C(P)   | 1,655             | 59     | 1,524 | 72     | 2             | CTT                    | 507      | 54.36   | 4.82  | 1            |
| P/V/C(V)   | 1,656             | 59     | 900   | 697    | 2             | CTT                    | 299      | 32.57   | 4.56  | 1            |
| P/V/C(C)   | 1,655             | 81     | 534   | 1040   | 2             | CTT                    | 177      | 19.93   | 10.29 | 2            |
| M          | 1,460             | 32     | 1,008 | 420    | 4             | CTT                    | 335      | 37.54   | 9.15  | 3            |
| F          | 2,367             | 589    | 1,641 | 137    | 3             | CTT                    | 546      | 58.73   | 8.43  | 1            |
| H          | 1,958             | 20     | 1,830 | 108    | 3             | CGT                    | 609      | 67.90   | 6.61  | 2            |
| L          | 6,643             | 22     | 6,552 | 69     | 2             | (CTT)                  | 2,183    | 248.21  | 8.48  | 3            |
| Trailer    | 40                | —      | —     | —      | —             | —                      | —        | —       | —     | —            |

**Table S3. FmoPV viral load and antibody level of RT-PCR positive stray cats in this study**

| Cat no. | Date of sample collection | Type of positive sample(s) | FmoPV                 |              |
|---------|---------------------------|----------------------------|-----------------------|--------------|
|         |                           |                            | Viral load, copies/mL | Western blot |
| 543     | 14 May 2009               | Urine                      | $1.4 \times 10^4$     | +            |
| 545     | 14 May 2009               | Fecal swab                 | $3.8 \times 10^5$     | -            |
| 557     | 12 June 2009              | Urine                      | $9.5 \times 10^2$     | +            |
| 572     | 24 June 2009              | Urine                      | $1.2 \times 10$       | +            |
| 587     | 2 July 2009               | Urine                      | 4.88                  | ++           |
| 591     | 8 July 2009               | Urine                      | $2.7 \times 10^4$     | +++          |
| 592     | 8 July 2009               | Urine                      | $3.0 \times 10^3$     | +++          |
| 670     | 27 Aug 2009               | Urine                      | $2.7 \times 10^3$     | +            |
| 680     | 31 Aug 2009               | Urine                      | $8.8 \times 10^3$     | +++          |
| 688     | 3 Sep 2009                | Urine                      | $7.1 \times 10^3$     | +++          |
| 725     | 3 Nov 2009                | Fecal swab                 | $2.7 \times 10^3$     | ++           |
| 761     | 24 Nov 2009               | Urine                      | $5.9 \times 10^5$     | +++          |
| 773     | 1 Dec 2009                | Urine                      | $6.4 \times 10^4$     | +            |
| 776     | 4 Dec 2009                | Urine                      | $2.3 \times 10^3$     | +++          |
| 802     | 24 Dec 2009               | Urine                      | 2.76                  | -            |
| 810     | 29 Dec 2009               | Urine                      | $1.6 \times 10^2$     | -            |
| 818     | 12 Jan 2010               | Urine                      | 1.06                  | -            |
| 835     | 22 Jan 2010               | Urine                      | $2.4 \times 10^4$     | +            |
| 850     | 29 Jan 2010               | Urine                      | $2.1 \times 10^4$     | ++           |
| 851     | 29 Jan 2010               | Urine                      | 2.6                   | ++           |
|         |                           | Fecal swab                 | $5.0 \times 10^2$     |              |
| 858     | 26 Feb 2010               | Urine                      | $6.9 \times 10^4$     | +            |
| 898     | 23 Mar 2010               | Urine                      | $2.4 \times 10^4$     | +            |
| 900     | 23 Mar 2010               | Urine                      | $1.6 \times 10^4$     | +            |
| 906     | 23 Mar 2010               | Urine                      | $9.8 \times 10^3$     | ++           |
|         |                           | Fecal swab                 | $2.0 \times 10^4$     |              |
| 908     | 25 Mar 2010               | Urine                      | $8.8 \times 10^2$     | +            |
| 909     | 25 Mar 2010               | Urine                      | $2.6 \times 10^3$     | -            |
| 938     | 29 Apr 2010               | Urine                      | $2.1 \times 10^2$     | ++           |
| 962     | 6 May 2010                | Urine                      | $8.0 \times 10^3$     | +++          |
| 968     | 10 May 2010               | Urine                      | $4.7 \times 10^2$     | +++          |
| 970     | 10 May 2010               | Blood                      | $3.1 \times 10^4$     | +++          |
| 979     | 17 May 2010               | Urine                      | $5.3 \times 10^3$     | +++          |
| 990     | 24 May 2010               | Urine                      | $1.4 \times 10^3$     | ++           |
| 997     | 31 May 2010               | Urine                      | $5.0 \times 10^3$     | ++           |
| 1012    | 10 June 2010              | Urine                      | $9.5 \times 10^3$     | +            |
| 1036    | 28 June 2010              | Urine                      | $1.6 \times 10^4$     | ++           |
| 1055    | 2 Aug 2010                | Urine                      | $1.0 \times 10^3$     | +            |
| 1057    | 2 Aug 2010                | Urine                      | $9.7 \times 10^3$     | ++           |
| 1078    | 9 Sep 2010                | Urine                      | $2.0 \times 10^5$     | +            |
| 1091    | 24 Sep 2010               | Urine                      | $7.0 \times 10^3$     | +            |
| 1096    | 27 Sep 2010               | Urine                      | $2.0 \times 10^1$     | +++          |
| 1107    | 7 Oct 2010                | Urine                      | $4.6 \times 10^3$     | ++           |
| 1148    | 25 Oct 2010               | Urine                      | $1.4 \times 10^5$     | ++           |
| 1155    | 28 Oct 2010               | Urine                      | $3.2 \times 10^{-1}$  | +            |
| 1189    | 25 Nov 2010               | Urine                      | $6.9 \times 10^3$     | +            |
| 1226    | 6 Jan 2011                | Urine                      | $3.7 \times 10^{-2}$  | +++          |
| 1297    | 28 Feb 2011               | Urine                      | $2.7 \times 10^2$     | +            |
| 1312    | 9 Mar 2011                | Urine                      | 3.8                   | ++           |
| 1314    | 9 Mar 2011                | Urine                      | $1.6 \times 10^3$     | -            |
| 1325    | 14 Mar 2011               | Urine                      | $2.3 \times 10^3$     | ++           |
| 1327    | 24 Mar 2011               | Urine                      | $3.7 \times 10^4$     | +            |
| 1336    | 31 Mar 2011               | Urine                      | $5.4 \times 10^5$     | ++           |
| 1357    | 28 Apr 2011               | Urine                      | $1.0 \times 10^2$     | ++           |
| 1359    | 28 Apr 2011               | Urine                      | $2.0 \times 10^5$     | +            |
| 1392    | 30 May 2011               | Urine                      | $5.2 \times 10^4$     | -            |
| 1407    | 13 June 2011              | Urine                      | $3.5 \times 10$       | ++           |
| 1409    | 16 June 2011              | Urine                      | $1.4 \times 10^6$     | +            |



**Table S5. Viruses and GenBank accession numbers**

| Abbreviation | Virus name                        | GenBank accession no.                                  |
|--------------|-----------------------------------|--------------------------------------------------------|
| AsaPV        | Atlantic Salmon paramyxovirus     | EU156171                                               |
| AviPV-5      | Avian paramyxovirus 5             | GU206351                                               |
| AviPV-6      | Avian paramyxovirus 6             | NC_003043                                              |
| AviPV-7      | Avian paramyxovirus 7             | FJ231524                                               |
| BeiPV        | Beilong virus                     | NC_007803                                              |
| BpiPV-3      | Bovine parainfluenza virus 3      | NC_002161                                              |
| CdiPV        | Canine distemper virus            | NC_001921                                              |
| DmoPV        | Dolphin morbillivirus             | NC_005283                                              |
| FdlPV        | Fer-de-lance virus                | NC_005084                                              |
| FmoPV 761U   | Feline morbillivirus strain 761U  | JQ411014                                               |
| FmoPV 776U   | Feline morbillivirus strain 776U  | JQ411015                                               |
| FmoPV M252A  | Feline morbillivirus strain M252A | JQ411016                                               |
| GooPV        | Goose paramyxovirus SF02          | NC_005036                                              |
| HenPV        | Hendra virus                      | NC_001906                                              |
| HpiPV-1      | Human parainfluenza virus 1       | NC_003461                                              |
| HpiPV-2      | Human parainfluenza virus 2       | NC_003443                                              |
| HpiPV-3      | Human parainfluenza virus 3       | NC_001796                                              |
| HpiPV-4a     | Human parainfluenza virus 4a      | BAJ11741                                               |
| HuRSV        | Human respiratory syncytial virus | NC_001781                                              |
| JPV          | J-virus                           | NC_007454                                              |
| MeaPV        | Measles virus                     | NC_001498                                              |
| MosPV        | Mossman virus                     | NC_005339                                              |
| MumPV        | Mumps virus                       | NC_002200                                              |
| NarPV        | Nariva virus                      | FJ362497                                               |
| NdiPV        | Newcastle disease virus           | NC_002617                                              |
| NipPV        | Nipah virus                       | NC_002728                                              |
| PdiPV        | Phocine distemper virus           | P35944, P35939, BAA01205, BAA01206, CAA12080, CAA70843 |
| PprPV        | Peste-des-petits-ruminants virus  | NC_006383                                              |
| RinPV        | Rinderpest virus                  | NC_006396                                              |
| SenPV        | Sendai virus                      | NC_001552                                              |
| SpiPV-3      | Swine parainfluenza virus 3       | EU439429                                               |
| ThkPV-1      | Tuhoko virus 1                    | GU128080                                               |
| ThkPV-2      | Tuhoko virus 2                    | GU128081                                               |
| ThkPV-3      | Tuhoko virus 3                    | GU128082                                               |
| TlmPV        | Tailam virus                      | JN689227                                               |
| TupPV        | Tupaia paramyxovirus              | NC_002199                                              |

Fig. S1 shows phylogenetic analysis of amino acid sequences of 72-bp fragment of L gene of paramyxoviruses identified from cats in the present study.

**Fig. S1.** Phylogenetic analysis of amino acid sequences of 72-bp fragment of L gene of paramyxoviruses identified from cats in the present study. The tree was constructed by neighbor-joining method. The scale bar indicates the branch length that corresponds to 2 amino acid differences per sequence. The three strains from stray cats numbered 761U, 776U, and M252A with genome sequences determined are shown in bold. RSV, respiratory syncytial virus (U39661); DmoPV, dolphin morbillivirus (NC\_005283); PprPV, Peste-des-petits-ruminants virus (NC\_006383); MeaPV, measles virus (NC\_001498); CdiPV, canine distemper virus (NC\_001921); MosPV, Mossman virus (NC\_005339); NarPV, Nariva virus (FJ362497); ThkPV3, Tuhoko virus 3 (GU128082); ThkPV2, Tuhoko virus 2 (GU128081); ThkPV, Tuhoko virus 1 (GU128080); JPV, J-virus (NC\_007454); BeiPV, Beilong virus (NC\_007803); NipPV, Nipah virus (NC\_002728); HenPV, Hendra virus (NC\_001906); FdlPV, Fer-de-lance virus (NC\_005084); SenPV, Sendai virus (NC\_001552); HpiPV-1, human parainfluenza virus 1 (NC\_003461).

[Fig. S1](#)

**Fig. S2.** 5' Trailer sequences and ends of L genes in the genomes of the three strains of FmoPV (400 nt in all three genomes), two strains of avian paramyxovirus 3 (681 and 707 nt), and one strain each of avian paramyxovirus 5 (552 nt) and Tupaia paramyxovirus (590 nt). The ruler above the sequences shows the nucleotide positions in the 5' trailer sequences.

[Fig. S2](#)

**Fig. S3.** Polymorphic nucleotide sites in the genes among the three FmoPV genomes. All polymorphic nucleotide sites are highlighted in yellow and all polymorphic nucleotide sites and their codons resulting in amino acid changes are highlighted in rectangles.

[Fig. S3](#)

**Fig. S4.** Multiple alignments of N proteins of FmoPV and other morbilliviruses. The conserved MA(S,T)L motif in morbilliviruses and the three conserved motifs in paramyxoviruses are marked in open boxes and reported consensus sequences are indicated above the alignment (where x represents any amino acid residue and Ø represents an aromatic amino acid residue). Amino acid residue numbers for each protein are shown to the right of each sequence. Dots indicate identical residues and dashes indicate gaps. The nuclear export signals are highlighted in yellow and the NLS highlighted in green.

[Fig. S4](#)

**Fig. S5.** Western blot analysis with stray cat sera against the purified (His)<sub>6</sub>-tagged recombinant FmoPV N protein antigen. Prominent immunoreactive protein bands of approximately 69 kDa, consistent with the expected size of 68.7 kDa of the recombinant protein, were detected in three of the six cat serum samples shown, indicating antigen–antibody interactions between the recombinant FmoPV N protein and serum antibodies. Results of RT-PCR of the corresponding urine samples for FmoPV are also shown.

[Fig. S5](#)

**Fig. S6.** Representative images of cauxin-immunohistochemical stained paraffin-embedded renal sections of cats with and without histological evidence of tubulointerstitial nephritis (TIN). (A) In cats without histological evidence of TIN, cauxin-positive proximal straight renal tubules are observed between the inner cortex and outer medulla; (B) in cats with histological evidence of TIN, the number of cauxin-positive tubules is significant reduced compared with cats without histological evidence of TIN.

[Fig. S6](#)

**Fig. S7.** Double staining of the lymph node of an FmoPV infected stray cat for (A) mouse anti-human myeloid/histocyte antigen and then labeled with Texas red-conjugated goat anti-mouse IgG and (B) guinea pig antiserum against the N protein of FmoPV, followed by FITC-conjugated rabbit anti-guinea pig IgG. (C) Merged photo shows yellow, indicating that both antigens colocalized in cytoplasm of the cells.

[Fig. S7](#)

**Fig. S8.** Recombination analysis of the three complete genomes of FmoPV (761U, 776U, and M252A) using Recombination Analysis Tool (RAT), indicating that no evidence of recombination was observed among the three strains of FmoPV. The y axis represents the similarity between the test sequence (A, 761U; B, 776U; C, M252A) and other sequences. The x axis represents the location on the sequence. Default parameters were used and Auto Search was performed to search for possible recombination events.

[Fig. S8](#)
