# Supplementary material
Source: PubMed Central journal article supplement (PMC3325679)
Supplement: 1119972109_sfig03.pdf [file 1119972109_sfig03.pdf]

SI Fig. 3

N

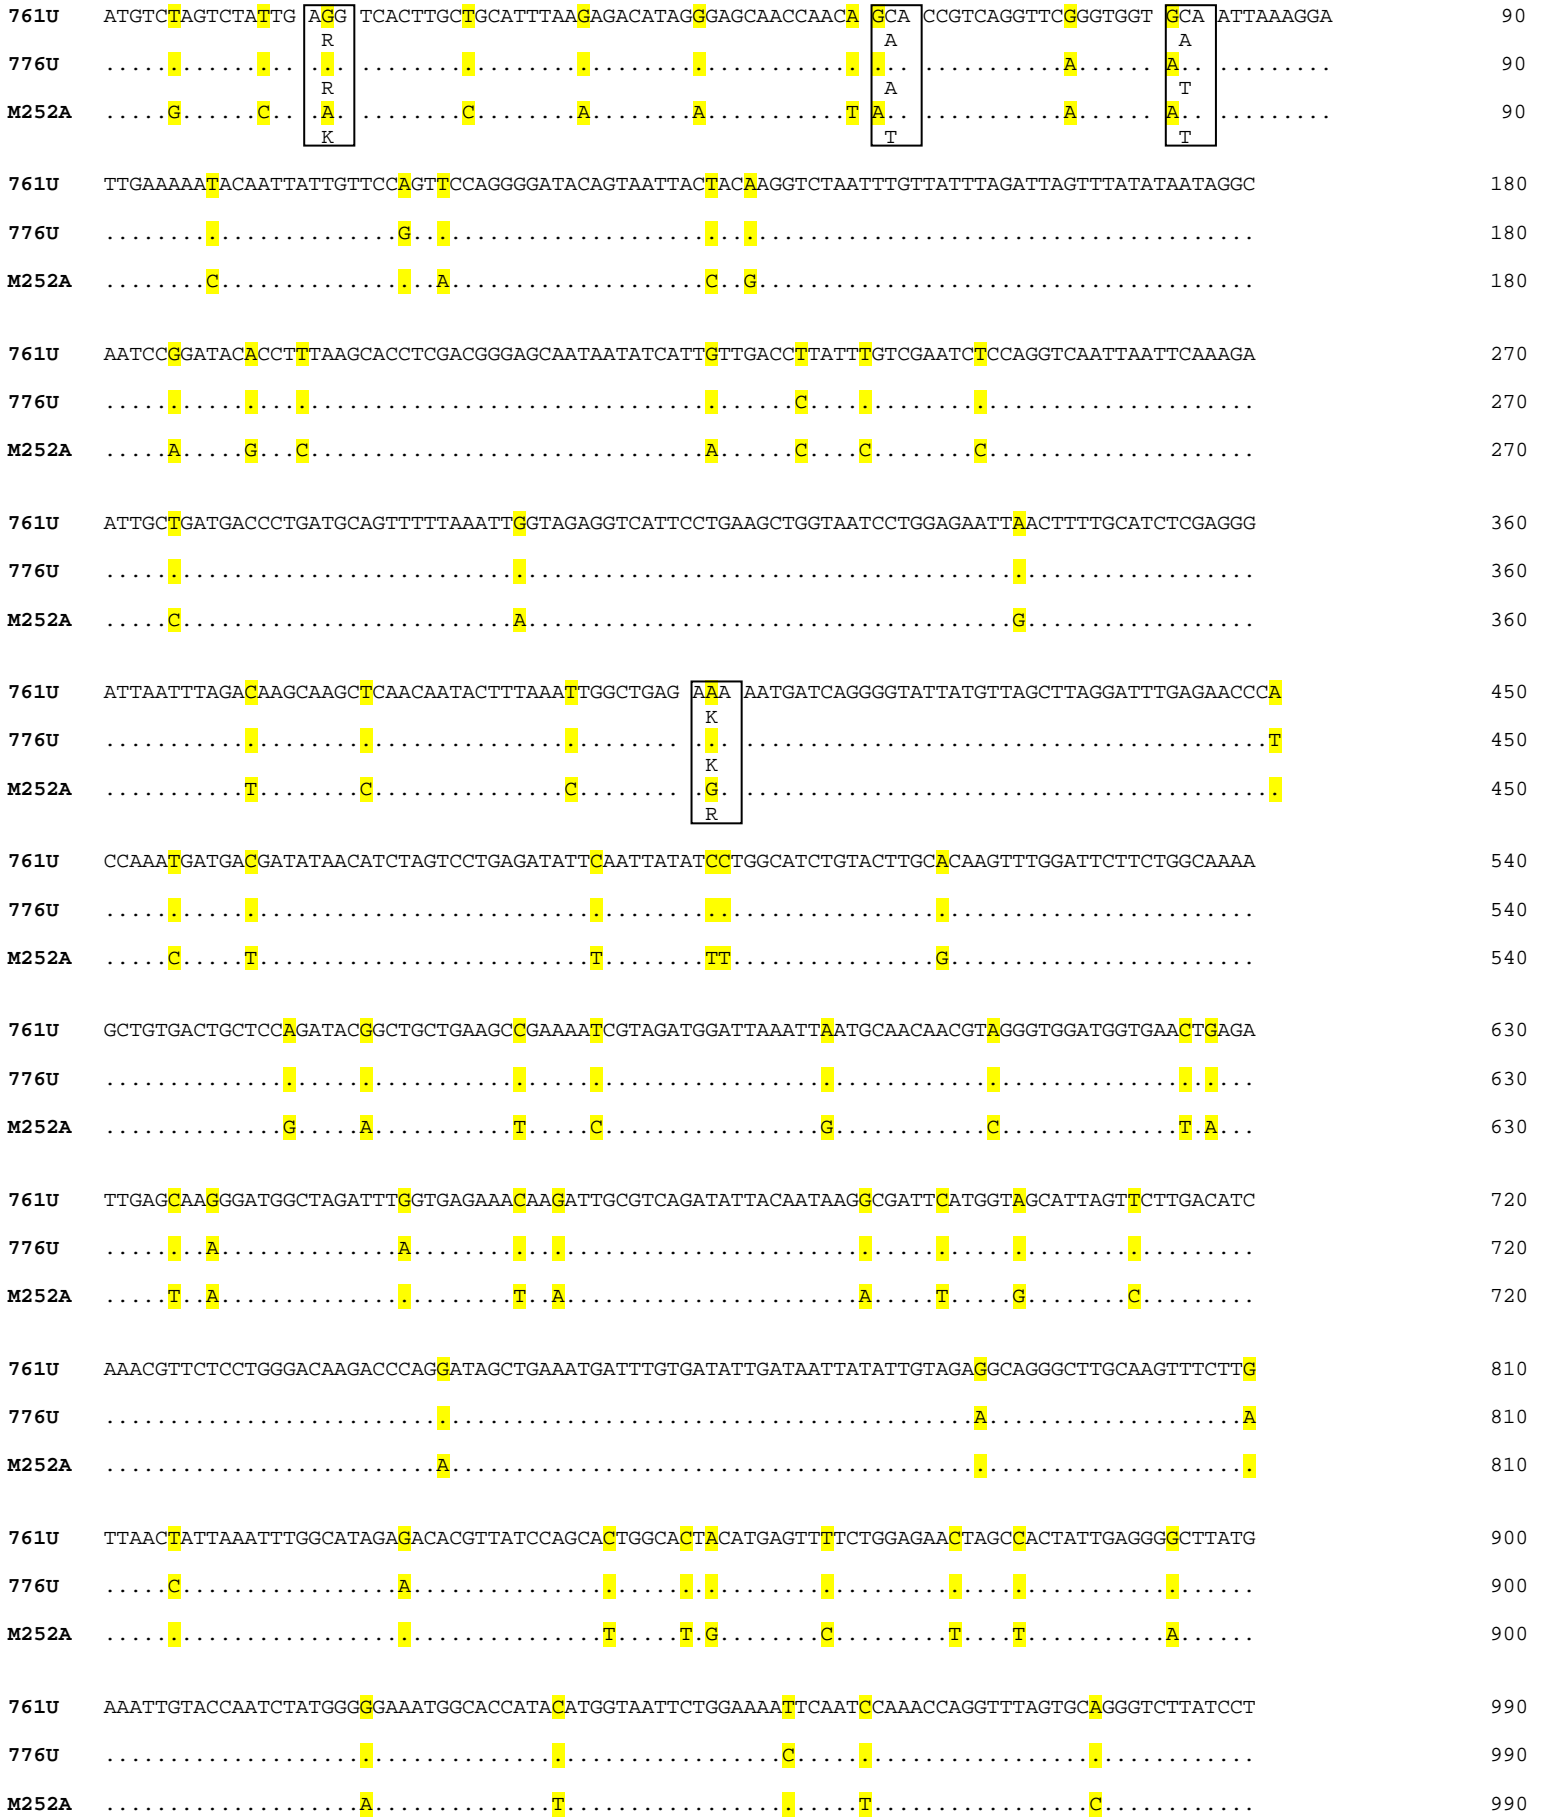

761U CTGCTATGGAGTTATGCCATGGGTGTCGGGGTGGAGCTTGAAAGATCAATGGGTGGACTCAATTTCACTAGAAGCTTCTTTGACCCATACA 1080  
 776U .....A.....G.. 1080  
 M252A T.....C.T.T.....G.....T.T.G.....G 1080

761U TATTTTCAGACTTGGTCAAGAGATGGTGAGGAGATCTTCAGGGATGGTTAATAGTTCATTTCGCGAGAGAAGCTTGGCTATCTGATCATGAA 1170  
 776U .....G.....G.....E.....G..... 1170  
 M252A ..C.....A.....C.....G.....A.....G 1170

761U ACACAAGTGTGTCAGCCAGATTGTCAATTCGGGAGGTGAATCTGGGATACCTAAATTTGATGGATTTCAGAGCAAATCCAACAACTTTCTA 1260  
 776U .....G.....G.....C..... 1260  
 M252A .....T.....A.....T.....C..... 1260

761U GGAACCAAAAGATAACATAAATGATAGAGGTGAAGATCAGTCAAAATTCGATAATCAGGGTTACCTGGTCCACTATTACCCAGCCGTGACCTA 1350  
 776U .....G.....G.....G.....R.....R.....I.....I..... 1350  
 M252A .....T.....T.....N.....A.....G.....G.....A.....G.....T.....T..... 1350

761U AATCTTTCAGGTGATTTCATATGGAATTAAATAGTGGTGTGAAAAATGTCAGTGACAAACTGAAATGAAGGAGTATGGTCCAGACCATGATGTG 1440  
 776U G.....L.....S.....I.....N.....S.....D.....N.....V.....G..... 1440  
 M252A .C..A..C.....GCA.....G.....GA.....A.T.....T.....G.....S.....A.....A.....T..... 1440

761U TCCAGTCTCTGCCATGGAAGAATTGAGAGATTGGTTGAGTCCACCAACAGAATAGACACCAAACAGCCAGAGAGCTTCAAGGTGTCACCAAC 1530  
 776U .....G.....G.....T.....T.....Q.....G.....S..... 1530  
 M252A ..T.C.....G.G.A.....T.....T.....A.....G.....C.....P..... 1530

761U CATTATAATGATACTGACCTTCTAAAATA 1560  
 776U .....G.....K..... 1560  
 M252A .....C.C.....T.....G.....R..... 1560



|       |                                                    |                  |                                                                   |      |                           |             |                        |          |                 |      |
|-------|----------------------------------------------------|------------------|-------------------------------------------------------------------|------|---------------------------|-------------|------------------------|----------|-----------------|------|
| 761U  | GACATTGACAATCTAAAAAAG                              | AAT              | AGTGCTAAAGTGCAATTGGCTCTATCAACTATTGAGGGACATCTATCCAGTGTATGATTGCCATC | 1080 |                           |             |                        |          |                 |      |
| 776U  | .....T.....                                        | N                | .....A.....                                                       | 1080 |                           |             |                        |          |                 |      |
| M252A | .....G.....                                        | N                | .....ATG.....                                                     | 1080 |                           |             |                        |          |                 |      |
|       |                                                    | S                |                                                                   |      |                           |             |                        |          |                 |      |
| 761U  | CCTGGTTCAGGTATTGATTCCACAGG                         | GAT              | GAG                                                               | GAA  | AAGGATCAG                 | ATA         | AATTCTGACTTAAAACCACTGC | TAGGA    | AGGGATCATTGTAGA | 1170 |
| 776U  | .....                                              | D                |                                                                   | E    | C                         | I           |                        |          |                 | 1170 |
| M252A | .....T.....                                        | D                |                                                                   | E    |                           | I           |                        |          |                 | 1170 |
|       |                                                    | E                |                                                                   | K    |                           | M           |                        |          |                 |      |
| 761U  | GCATTCGAGAAGTTACAATCCTCTAGATGAGTCT                 | TCA              | CTAGCCAATTCTCCAACAAAACATGTTGCCAAG                                 | STA  | AAC                       | AAAACTGCACT | 1260                   |          |                 |      |
| 776U  | .....                                              | S                |                                                                   | V    | N                         | C           |                        | 1260     |                 |      |
| M252A | .....T.....                                        | S                | G                                                                 | V    | N                         | C           | T                      | 1260     |                 |      |
|       |                                                    | L                |                                                                   | I    | D                         |             |                        |          |                 |      |
| 761U  | CTTCAGAAATCAACAAGAACGAAACATCTGCAATCAAA             | TTTGTCC          | AGT                                                               | GAC  | CAGTCATGCAAGCACATCAACCATC | AGA         | TCAATTATC              | 1350     |                 |      |
| 776U  | .....                                              |                  | S                                                                 |      |                           | R           |                        | 1350     |                 |      |
| M252A | .....A.....                                        |                  | S                                                                 |      |                           | R           |                        | 1350     |                 |      |
|       |                                                    |                  | N                                                                 |      |                           | K           |                        |          |                 |      |
| 761U  | AGGTCATCTAATCTCGATCAGGATTTGAAAACAAAAATTGCTCACAATTC | TATCCCGATTAGAGGG | GCA                                                               | GAC  | AAT                       | ATT         | AGA                    | GAATCTAT | 1440            |      |
| 776U  | .....                                              |                  | A                                                                 | D    |                           | I           | R                      |          | 1440            |      |
| M252A | .....G.....                                        |                  | V                                                                 | D    |                           | I           | R                      |          | 1440            |      |
|       |                                                    |                  | T                                                                 | E    |                           | V           | K                      |          |                 |      |
| 761U  | GAAAAGGTTATGATATTAATAAAGAATAAGAATTAA               | 1476             |                                                                   |      |                           |             |                        |          |                 |      |
| 776U  | .....                                              | 1476             |                                                                   |      |                           |             |                        |          |                 |      |
| M252A | .....G.....                                        | 1476             |                                                                   |      |                           |             |                        |          |                 |      |



761U AATGGTCTCTTCAAGATTAATAG

1014

776U .....

1014

M252A .....

1014

F

|       |                                                   |                       |                                                           |                                              |                                      |                                     |                                   |     |
|-------|---------------------------------------------------|-----------------------|-----------------------------------------------------------|----------------------------------------------|--------------------------------------|-------------------------------------|-----------------------------------|-----|
| 761U  | ATGAACAGAAATTAAGGTT                               | ATG                   | ATAATTAGTTCCTTA                                           | TTATTATCAGATATTACGATTGCACAAATAGGTTGGGATAATTT | CACTTCGATT                           | 90                                  |                                   |     |
| 776U  | . . . . . G . . . . .                             | . . . . . A . . . . . | . . . . . . . . . . .                                     | . . . . . C . . . . .                        | . . . . . . . . . . .                | 90                                  |                                   |     |
| M252A | . . . . . . . . . . .                             | . . . . . A . . . . . | . . . . . . . . . . .                                     | . . . . . G . . . . .                        | . . . . . C . . . . . A . . . . .    | 90                                  |                                   |     |
| 761U  | GGAGTTATAAGTACTAAGCAATAC                          | GAC                   | TATAAAAATAACTACTCTCAACACT                                 | GAC                                          | CAGTTAATGGTTATAAAGATGGTTCCTAATATATCA | 180                                 |                                   |     |
| 776U  | . . . . . . . . . . .                             | . . . . . D . . . . . | . . . . . . . . . . .                                     | . . . . . . . . . . .                        | . . . . . . . . . . .                | 180                                 |                                   |     |
| M252A | . . . . . G . . . . .                             | . . . . . G . . . . . | . . . . . A . . . . .                                     | . . . . . A . . . . . T . . . . .            | . . . . . A . . . . . T . . . . .    | 180                                 |                                   |     |
| 761U  | TCAATCATTAAATGCACTAAACTCGAATTACA                  | ACA                   | AAATATAGAGAGTTAGTCTCAGGGATCATTAGACCAATAAATGAGTCATTAGAATTA |                                              |                                      | 270                                 |                                   |     |
| 776U  | . . . . . . . . . . .                             | . . . . . . . . . . . | . . . . . C . . . . .                                     | . . . . . . . . . . .                        | . . . . . . . . . . .                | 270                                 |                                   |     |
| M252A | . . . . . . . . . . .                             | . . . . . T . . . . . | . . . . . G . . . . .                                     | . . . . . . . . . . .                        | . . . . . . . . . . .                | 270                                 |                                   |     |
| 761U  | ATGAATTCATACATTAAACATGAGA                         | GCA                   | GGTTCAGAGAGATTATAGGGCTGTAATAGCTGTTGAGCC                   | TTAGGAGTGGCAACTGCAGCA                        |                                      | 360                                 |                                   |     |
| 776U  | . . . . . . . . . . .                             | . . . . . . . . . . . | . . . . . C . . . . .                                     | . . . . . . . . . . .                        | . . . . . . . . . . .                | 360                                 |                                   |     |
| M252A | . . . . . C . . . . .                             | . . . . . T . . . . . | . . . . . . . . . . .                                     | . . . . . . . . . . .                        | . . . . . A . . . . . A . . . . .    | 360                                 |                                   |     |
| 761U  | CAAATAACATCAGGGATTGCCCTACATAATTCAATTATGAACAAAAACA | A                     | AATACAAGA                                                 | ATTGAGGAAGGCTCTTAGTACTAC                     | CAACAAA                              | 450                                 |                                   |     |
| 776U  | . . . . . . . . . . .                             | . . . . . . . . . . . | . . . . . G . . . . .                                     | . . . . . . . . . . .                        | . . . . . T . . . . .                | 450                                 |                                   |     |
| M252A | . . . . . . . . . . .                             | . . . . . . . . . . . | . . . . . G . . . . .                                     | . . . . . G . . . . .                        | . . . . . . . . . . .                | 450                                 |                                   |     |
| 761U  | GCAATTGATGAAATAAGGATTGCAGGTGAAAGAACATTA           | ATA                   | GCA                                                       | ATT                                          | CAAGGTGTACAGGATTATATTAATAATATAATT    | ATC                                 | CCTATG                            | 540 |
| 776U  | . . . . . . . . . . .                             | . . . . . . . . . . . | . . . . . . . . . . .                                     | . . . . . . . . . . .                        | . . . . . . . . . . .                | . . . . . . . . . . .               | . . . . . . . . . . .             | 540 |
| M252A | . . . . . . . . . . .                             | . . . . . C . . . . . | . . . . . . . . . . .                                     | . . . . . G . . . . .                        | . . . . . G . . . . . A . . . . .    | . . . . . . . . . . .               | . . . . . C . . . . .             | 540 |
| 761U  | CAGGACAAACTCCAATGTGATATTTTATCATCACAA              | CTTCTGTGCT            | TTACTCAGATATTATACAAATATA                                  | CTAACAGT                                     | TTTTGG                               | CCCA                                |                                   | 630 |
| 776U  | . . . . . . . . . . .                             | . . . . . . . . . . . | . . . . . . . . . . .                                     | . . . . . T . . . . .                        | . . . . . . . . . . .                | . . . . . . . . . . .               | . . . . . . . . . . .             | 630 |
| M252A | . . . . . . . . . . .                             | . . . . . G . . . . . | . . . . . A . . . . .                                     | . . . . . . . . . . .                        | . . . . . T . . . . .                | . . . . . C . . . . . A . . . . .   | . . . . . . . . . . .             | 630 |
| 761U  | AGTATACGGGATCCTATTACTAGTACA                       | ATT                   | TCA                                                       | GTACAAGCACTCAGTCAAGCATTCAATGGTAATCTTCAGGCATT | GCTTGATGGACTG                        | 720                                 |                                   |     |
| 776U  | . . . . . . . . . . .                             | . . . . . . . . . . . | . . . . . G . . . . .                                     | . . . . . G . . . . .                        | . . . . . . . . . . .                | . . . . . T . . . . .               | . . . . . . . . . . .             | 720 |
| M252A | . . . . . A . . . . .                             | . . . . . C . . . . . | . . . . . C . . . . .                                     | . . . . . G . . . . .                        | . . . . . . . . . . .                | . . . . . T . . . . .               | . . . . . C . . . . . A . . . . . | 720 |
| 761U  | GGCTATACTGGG                                      | AGA                   | GACTTA                                                    | CGT                                          | GATCTTCTAGAGAGTAAATCTATCACTGGC       | CAGATAATTCATGCAGATATGACTGATTGTTCCTT | 810                               |     |
| 776U  | . . . . . A . . . . .                             | . . . . . . . . . . . | . . . . . . . . . . .                                     | . . . . . . . . . . .                        | . . . . . . . . . . .                | . . . . . . . . . . .               | . . . . . . . . . . .             | 810 |
| M252A | . . . . . A . . . . .                             | . . . . . . . . . . . | . . . . . . . . . . .                                     | . . . . . . . . . . .                        | . . . . . . . . . . .                | . . . . . T . . . . .               | . . . . . . . . . . .             | 810 |
| 761U  | GTTT                                              | TGAGAATAAATTAT        | CCTTC                                                     | CATAACTGAGATGCAGGGAGTAACAATATAT              | GGG                                  | CTCAATTCAATTACATATCATATTGGGCCTGAA   | 900                               |     |
| 776U  | . . . . . C . . . . .                             | . . . . . . . . . . . | . . . . . T . . . . .                                     | . . . . . . . . . . .                        | . . . . . . . . . . .                | . . . . . . . . . . .               | . . . . . . . . . . .             | 900 |
| M252A | . . . . . C . . . . .                             | . . . . . T . . . . . | . . . . . C . . . . .                                     | . . . . . . . . . . .                        | . . . . . AA . . . . .               | . . . . . G . . . . .               | . . . . . . . . . . .             | 900 |
| 761U  | GAGTGGTATACCATTATGCCTGATTTTAT                     | TGCTGTT               | CAGGGTTTTTAATATCTAATTTGATGAG                              | GAGAAAGTGTCA                                 | GTA                                  | ACTAAATCA                           | 990                               |     |
| 776U  | . . . . . . . . . . .                             | . . . . . . . . . . . | . . . . . . . . . . .                                     | . . . . . . . . . . .                        | . . . . . A . . . . .                | . . . . . . . . . . .               | . . . . . . . . . . .             | 990 |
| M252A | . . . . . . . . . . .                             | . . . . . T . . . . . | . . . . . A . . . . .                                     | . . . . . . . . . . .                        | . . . . . A . . . . .                | . . . . . . . . . . .               | . . . . . G . . . . .             | 990 |







|       |                                                                                               |     |                                             |             |                                                                             |                                                                          |                                                 |      |
|-------|-----------------------------------------------------------------------------------------------|-----|---------------------------------------------|-------------|-----------------------------------------------------------------------------|--------------------------------------------------------------------------|-------------------------------------------------|------|
| 761U  | ATCAGGAGCCACATGAGATTGATAAAATTTGGTTAACATCT                                                     | GAT | AGAGGCCAAATTATCTCTGGTTATTTTCAGCATTGTTACCATT | 1080        |                                                                             |                                                                          |                                                 |      |
| 776U  | .....                                                                                         | D   | .....                                       | 1080        |                                                                             |                                                                          |                                                 |      |
| M252A | .....A.....A.A.....                                                                           | D   | .....G.G.....T.....                         | 1080        |                                                                             |                                                                          |                                                 |      |
|       |                                                                                               | E   |                                             |             |                                                                             |                                                                          |                                                 |      |
| 761U  | ACAATTCGGAACTATAATAATTATCCCTACAAATGCTTAAATAACCCATGTTTTGACAACCTCTGAGAATTACTGTAGAGGATGGTATAAA   |     |                                             | 1170        |                                                                             |                                                                          |                                                 |      |
| 776U  | .....                                                                                         |     | .....                                       | 1170        |                                                                             |                                                                          |                                                 |      |
| M252A | .....T.....T.....T.C.....G.....                                                               |     |                                             | 1170        |                                                                             |                                                                          |                                                 |      |
| 761U  | AACATAACAGGAAGTACTGATGATGTTCCGATATTAGCATACTTATTGGTTGAAATGTATGATGAGGACGGACCTTTAATTACACTTGTGGCA |     |                                             | 1260        |                                                                             |                                                                          |                                                 |      |
| 776U  | .....                                                                                         |     | .....A.....                                 | 1260        |                                                                             |                                                                          |                                                 |      |
| M252A | .....T.C.....C.A.....A.A.....A.....                                                           |     |                                             | 1260        |                                                                             |                                                                          |                                                 |      |
| 761U  | ATACCACTTACAATTATACAGCTCCATCTCATAATTCTCTTTACTATGATGACAAA                                      | ATT | AATAAATTAATAATGACTACATCTCACATA              | 1350        |                                                                             |                                                                          |                                                 |      |
| 776U  | .....                                                                                         | I   | .....                                       | 1350        |                                                                             |                                                                          |                                                 |      |
| M252A | .....C.G.....T.....                                                                           | V   | .....G.....                                 | 1350        |                                                                             |                                                                          |                                                 |      |
|       |                                                                                               | I   |                                             |             |                                                                             |                                                                          |                                                 |      |
| 761U  | GGT                                                                                           | TAT | ATTCAA                                      | ATC         | AACGAGGTGCATGAGGTAATTGTTGGCGATAAATTGAAGGCTATCCTCTTAAACAGATTCTCTGATGAACATCCT | 1440                                                                     |                                                 |      |
| 776U  | .....                                                                                         | Y   | .....                                       | I           | .....                                                                       | A.                                                                       | 1440                                            |      |
| M252A | .....                                                                                         | Y   | .....                                       | I           | .....                                                                       | A.                                                                       | 1440                                            |      |
|       |                                                                                               | C   | .....                                       | G.T         | .....                                                                       | A.                                                                       | 1440                                            |      |
|       |                                                                                               | H   | .....                                       | V           | .....                                                                       | A.                                                                       | 1440                                            |      |
| 761U  | AACCTGACTGCCTGTAGACTCAATCAGGTTATTAAGGAGCAATAC                                                 | AAG | TCTGACGGAACAATAATTTCAAATCT                  | GCA         | CTTATTGATATA                                                                | 1530                                                                     |                                                 |      |
| 776U  | .....                                                                                         | K   | .....                                       | A           | .....                                                                       | T.                                                                       | 1530                                            |      |
| M252A | .....T.T.....C.....G.....                                                                     | K   | .....                                       | V           | .....                                                                       | A.                                                                       | 1530                                            |      |
|       |                                                                                               | R   | .....                                       | A           | .....                                                                       | A.                                                                       | 1530                                            |      |
| 761U  | CAAGAACGAATGTACATTACA                                                                         | GTT | AAAGCT                                      | ATT         | CCACCA                                                                      | GCA                                                                      | GGTAACTATAACTTTACAGTTGAGTTGCATTCTAGATCAAACACATC | 1620 |
| 776U  | .....                                                                                         | V   | .....                                       | I           | .....                                                                       | A                                                                        | .....T                                          | 1620 |
| M252A | .....G.T.....                                                                                 | V   | .....                                       | I           | .....                                                                       | A                                                                        | .....T                                          | 1620 |
|       |                                                                                               | I   | .....                                       | V           | .....                                                                       | TG                                                                       | .....                                           | 1620 |
| 761U  | TAT                                                                                           | GTA | TCG                                         | TTACCA      | AAA                                                                         | CAGTTTAAATGCTAAGTATGACAAATTACATCTTGAGTGCTTTAGCTGGGACAAATCTGGTGGTGTGCTCTG | 1710                                            |      |
| 776U  | .....                                                                                         | V   | S                                           | .....G..... | K                                                                           | .....                                                                    | .....                                           | 1710 |
| M252A | .....                                                                                         | V   | S                                           | .....       | R                                                                           | .....                                                                    | .....                                           | 1710 |
|       |                                                                                               | L   | L                                           | .....       | K                                                                           | .....                                                                    | .....CT                                         | 1710 |
| 761U  | ATACCCAGTTTTCATTAAGTTGGAATGAATCCCTTTCTGTTGATACTGCCATTTCAATTTAATAAGCTGT                        | AAA | TGA                                         | 1788        |                                                                             |                                                                          |                                                 |      |
| 776U  | .....T.....                                                                                   | K   | .....                                       | 1788        |                                                                             |                                                                          |                                                 |      |
| M252A | .....T.....T.....T.....                                                                       | Q   | .....                                       | 1788        |                                                                             |                                                                          |                                                 |      |
|       |                                                                                               | K   | .....                                       | 1788        |                                                                             |                                                                          |                                                 |      |



|       |                                         |                             |                                           |                                       |                                 |                       |                                   |         |                                 |      |     |     |                       |     |                       |        |      |      |
|-------|-----------------------------------------|-----------------------------|-------------------------------------------|---------------------------------------|---------------------------------|-----------------------|-----------------------------------|---------|---------------------------------|------|-----|-----|-----------------------|-----|-----------------------|--------|------|------|
| 761U  | ATTAATGGGCTTGATTACATTATTGACA            | GTT                         | GATATTCATCTAACTGCAGAAGT                   | TTTTCTTTT                             | TAG                             | AAG                   | TTTGGTCATCCTTTT                   | 1080    |                                 |      |     |     |                       |     |                       |        |      |      |
| 776U  | . . . . . A . . . . . .                 |                             |                                           |                                       |                                 |                       | . . . . . . . . . . .             | 1080    |                                 |      |     |     |                       |     |                       |        |      |      |
| M252A | . . . . . A A . . . . T . . . . .       |                             |                                           |                                       |                                 |                       | . . . . . G C . . . . .           | 1080    |                                 |      |     |     |                       |     |                       |        |      |      |
|       |                                         |                             |                                           |                                       |                                 |                       |                                   |         |                                 |      |     |     |                       |     |                       |        |      |      |
| 761U  | TTAGAGGCACAAAATGCTGCTAATAATGT           | AAGGAAGTATATGAATAAG         | CCTAAAG                                   | GTAATATCATA                           | T                               | CAGACT                | TTAATGCAAGGACATGCG                | 1170    |                                 |      |     |     |                       |     |                       |        |      |      |
| 776U  | . . . . . A . . . . . C . . . . . .     |                             |                                           | . . . . . A . . . . . C . . . . .     |                                 |                       | . . . . . . . . . . .             | 1170    |                                 |      |     |     |                       |     |                       |        |      |      |
| M252A | . . . . . A . . . . . . G . . . . .     |                             |                                           | . . . . . A . G C . . . . C . . . . C |                                 |                       | . . . . . . . . . . .             | 1170    |                                 |      |     |     |                       |     |                       |        |      |      |
|       |                                         |                             |                                           |                                       |                                 |                       |                                   |         |                                 |      |     |     |                       |     |                       |        |      |      |
| 761U  | ATTTTGTGGGTATTATAATAAATGGATT            | TAGAGACG                    | CGCCAC                                    | GGGGGAACATGGCCTCCTGT                  | G                               | GAGTTACCA             | AATCATGCATCTGCTGTA                | 1260    |                                 |      |     |     |                       |     |                       |        |      |      |
| 776U  | . . . . . . . . . . . T . . . . .       |                             |                                           |                                       |                                 | A                     | . . . . . . . . . . .             | 1260    |                                 |      |     |     |                       |     |                       |        |      |      |
| M252A | . . . . . C T . . . . . T T . . . . .   |                             |                                           |                                       |                                 | A                     | . . . . . . . . . . .             | 1260    |                                 |      |     |     |                       |     |                       |        |      |      |
|       |                                         |                             |                                           |                                       |                                 |                       |                                   |         |                                 |      |     |     |                       |     |                       |        |      |      |
| 761U  | ATTGAAATGCCCACTTATCTGGAGAAGG            | TAAACATCTGAACAATGTCTCAACACT | GGAGATCCTT                                | TGTTGGATT                             | AGA                             | TTTAAATGT             | 1350                              |         |                                 |      |     |     |                       |     |                       |        |      |      |
| 776U  | . . . . . . . . . . . . . . . . .       |                             |                                           |                                       | C                               | . . . . . . . . . . . | 1350                              |         |                                 |      |     |     |                       |     |                       |        |      |      |
| M252A | . . . . . . C . . . . . . . . . . .     |                             |                                           |                                       |                                 | . . . . . . . . . . . | 1350                              |         |                                 |      |     |     |                       |     |                       |        |      |      |
|       |                                         |                             |                                           |                                       |                                 |                       |                                   |         |                                 |      |     |     |                       |     |                       |        |      |      |
| 761U  | TTTATGCCATTTGAGTCTAGATAGT               | GACCTTACAATGTACCTT          | AGA                                       | GACAAGGCG                             | CTG                             | TCACCTGTC             | GAGTGGGATT                        | AGTTTAT | 1440                            |      |     |     |                       |     |                       |        |      |      |
| 776U  | . . . . . . . . . . . C . . . . .       |                             | . . . . . . . . . . . T A . . . . .       |                                       |                                 |                       | . . . . . . . . . . . .           | 1440    |                                 |      |     |     |                       |     |                       |        |      |      |
| M252A | . . . . . C . . . . . . . . . . .       |                             | C G . . . . . T . . . . .                 |                                       |                                 |                       | . . . . . . . . . . . T . . . . . | 1440    |                                 |      |     |     |                       |     |                       |        |      |      |
|       |                                         |                             |                                           |                                       |                                 |                       |                                   |         |                                 |      |     |     |                       |     |                       |        |      |      |
| 761U  | GCTAAGGAGTATTTAAGCTATAAT                | CCAGGATTACCCACAAGTTCC       | CAGAAGATT                                 | GTAATGTAT                             | TCTTAGAAGAT                     | GATAAAGTTGAC          | CCCA                              | 1530    |                                 |      |     |     |                       |     |                       |        |      |      |
| 776U  | . . . . . . . . . . . A . . . . .       |                             | . . . . . . . . . . . . . . . .           |                                       |                                 |                       | . . . . . T . . . . .             | 1530    |                                 |      |     |     |                       |     |                       |        |      |      |
| M252A | . . G . A . . . . . A . C . . . . .     |                             | T . . . . C . T . . . . C . A . G . . . . |                                       |                                 |                       | T . . . . . T . . . . .           | 1530    |                                 |      |     |     |                       |     |                       |        |      |      |
|       |                                         |                             |                                           |                                       |                                 |                       |                                   |         |                                 |      |     |     |                       |     |                       |        |      |      |
| 761U  | TATGAAATGATCATGTACGTGATAAA              | TGGTGATTACTTAAGAGACAAAG     | AGTTTAA                                   | CCTTTCATACAG                          | C                               | CCTTAAAGAGAAAG        | AATTAAA                           | 1620    |                                 |      |     |     |                       |     |                       |        |      |      |
| 776U  | . . . . . . . . . . . . . . . . .       |                             |                                           | . . . . . . . . . . . . . . . .       |                                 |                       | . . . . . . . . . . .             | 1620    |                                 |      |     |     |                       |     |                       |        |      |      |
| M252A | . . . . . . . . . . . . . . . . .       |                             |                                           | . . . . . T . . . . . T . . . . .     |                                 |                       | G C . . . . . . . . . .           | 1620    |                                 |      |     |     |                       |     |                       |        |      |      |
|       |                                         |                             |                                           |                                       |                                 |                       |                                   |         |                                 |      |     |     |                       |     |                       |        |      |      |
| 761U  | GAGGTAGGTCGATTGTTTGCTAAA                | ATGACTATAAAG                | GATGAGGCTTGT                              | CAAGTATAGCTGAAAC                      | CTGATTGCCAATGGAG                | TAGGGAAG              | 1710                              |         |                                 |      |     |     |                       |     |                       |        |      |      |
| 776U  | . . . . . . . . . . . C . . . . .       |                             | . . . . . A . . . . . . . . . .           |                                       |                                 |                       | 1710                              |         |                                 |      |     |     |                       |     |                       |        |      |      |
| M252A | . . . . . . . . . . . C C . . . . .     |                             | T . . . . A . . . . . C . . . . .         |                                       |                                 |                       | 1710                              |         |                                 |      |     |     |                       |     |                       |        |      |      |
|       |                                         |                             |                                           |                                       |                                 |                       |                                   |         |                                 |      |     |     |                       |     |                       |        |      |      |
| 761U  | TTTTTCAAAGATAATGGAATGG                  | CAAAAGATGAACATAAAT          | TAACTAA                                   | GACGTTACACAAATTAG                     | CATTTCAGGTGTACCT                | TAAAGATAAT            | 1800                              |         |                                 |      |     |     |                       |     |                       |        |      |      |
| 776U  | . . . . . . . . . . . . . . . . .       |                             | . . . . . . . . . . . A . . . . .         |                                       |                                 | . . . . . . . . . . . | 1800                              |         |                                 |      |     |     |                       |     |                       |        |      |      |
| M252A | . . C . . . . . . . . . . . C . . . . A |                             | . . . . . . . . . . . . . . . .           |                                       |                                 | . . . . . . . . . . . | 1800                              |         |                                 |      |     |     |                       |     |                       |        |      |      |
|       |                                         |                             |                                           |                                       |                                 |                       |                                   |         |                                 |      |     |     |                       |     |                       |        |      |      |
| 761U  | TCTAAA                                  | CTTTATTAGATGAATGTTGGG       | GCAAGTA                                   | ATT                                   | CGACAATGTTCAAGTAGTACACAGATA     | AGG                   | GAACAG                            | ACT     | ATGAATTCACAA                    | 1890 |     |     |                       |     |                       |        |      |      |
| 776U  | . . . . . K . . . . . . . . . . . . .   |                             | . . . . . . . . . . . . . . . .           | I                                     | . . . . . . . . . . . . . . . . | R                     | . . . . . . . . . . .             | T       | . . . . . . . . . . .           | 1890 |     |     |                       |     |                       |        |      |      |
| M252A | . . . . . Q . . . . . . . . . . . . .   |                             | C . . . . . . . . . . . . . . .           | I                                     | . . . . . . . . . . . . . . . . | R                     | . . . . . . . . . . .             | A       | . . . . . . . . . . .           | 1890 |     |     |                       |     |                       |        |      |      |
|       |                                         |                             |                                           |                                       |                                 |                       |                                   |         |                                 |      |     |     |                       |     |                       |        |      |      |
| 761U  | TCA                                     | AAT                         | AGG                                       | GAA                                   | ATTGAATCAAAGTCTTCTAGG           | GCA                   | CGT                               | CTT     | AATAATAGAGATATCTTA              | AAG  | GGC | AAG | AGAGAT                | TCG | AAC                   | AAACAA | GTA  | 1980 |
| 776U  | . . . . . . . . . . . . . . . . .       |                             | . . . . . . . . . . . . . . . .           |                                       | . . . . . . . . . . . . . . . . | A                     | R                                 | L       | . . . . . . . . . . . . . . . . | K    |     | K   | . . . . . . . . . . . | S   | . . . . . . . . . . . | V      | 1980 |      |
| M252A | . . G . . . . . . . . . . . . . .       |                             | . . . . . C . . . . . . . . . . .         |                                       | A                               | T                     | A                                 | GA      | . . . . . . . . . . . . . . . . | K    |     | K   | . . . . . . . . . . . | S   | . . . . . T . . . . . | I      | 1980 |      |

|       |                                                                                            |      |
|-------|--------------------------------------------------------------------------------------------|------|
| 761U  | AAGTATCCTTCAAACACCGAGTATTATGAGACTATCAGTAGTTTCATAACTACTGACCTTAAAAAGTATGTCTTAACTGGCGATATGAA  | 2070 |
| 776U  | .....                                                                                      | 2070 |
| M252A | .....                                                                                      | 2070 |
| 761U  | TCAAGTAGTATGTTGCAGAGAGACTTAATGAAATTATGGAATGTCCTGGAATTTTTCAGTGGCTTCACAAAGATTTTGGAGAAATCTGTT | 2160 |
| 776U  | .....                                                                                      | 2160 |
| M252A | .....                                                                                      | 2160 |
| 761U  | CTATACGTTAGTGATCCAATCTAGTCCACCTGACTTTGATCAACATGTCGATATAGAATCAGTCCAAATGACCATATCTTTATCAAGTAC | 2250 |
| 776U  | .....                                                                                      | 2250 |
| M252A | .....                                                                                      | 2250 |
| 761U  | CCGATGGGTGGAATAGAGGGGTTCTGTCAAAAATTATGGACCATTAGTACAATTCCGTTCTATATTTAGCAGCTTTTGATACAGGGGTT  | 2340 |
| 776U  | .....                                                                                      | 2340 |
| M252A | .....                                                                                      | 2340 |
| 761U  | AGAATCTCATCATTGTTCAAGGCGATAACCAGCAATTGCAGTAAACCAAAAGAGTTCCGTCATCTTGGAGTTACTCAAAGAAAAAGGAA  | 2430 |
| 776U  | .....                                                                                      | 2430 |
| M252A | .....                                                                                      | 2430 |
| 761U  | GAATCAACTAAAATAACAACACAATATTTTCTTAATTTAAGACAACGCTTACACGATATAGGTCATGAATTCAAAGCAAATGAGACTATT | 2520 |
| 776U  | .....                                                                                      | 2520 |
| M252A | .....                                                                                      | 2520 |
| 761U  | ATATCCTCTCATTCTTTGTTTACTCTAAAGGTATTTATTAATGATGGAATACTTCTCTCCAGGCACTTAAAAGTATTGCAAGATGTGTC  | 2610 |
| 776U  | .....                                                                                      | 2610 |
| M252A | .....                                                                                      | 2610 |
| 761U  | TTTGGTCTGAAACGATTGTTGATGAGACTAGGTCAGCTTGCAGTAAATATATCTACGACACTCGCAAAGCAATTGAAAGGGGTTATGAT  | 2700 |
| 776U  | .....                                                                                      | 2700 |
| M252A | .....                                                                                      | 2700 |
| 761U  | AAATTGTGGCGTACGCTATCAATATTTATAAAACAATACATCAGGTGTTGATTGCATTGTCCTTTACGATTAATCCTACTATGACACCA  | 2790 |
| 776U  | .....                                                                                      | 2790 |
| M252A | .....                                                                                      | 2790 |
| 761U  | GACATTACAGAACCTTTCTACAAGAGTTTAGATCTACTTAAGAACTAGTTCTGATTCTCTGCACCATTAGGGGGCATGAACATATGAAC  | 2880 |
| 776U  | .....                                                                                      | 2880 |
| M252A | .....                                                                                      | 2880 |
| 761U  | ATGAGCAGGTTATTGTTAGGAATATAGGAGATCCATTACTGCTTCATTGCTGATATAAAGCGCATGATTGAATGTGGGTTCTTAGGA    | 2970 |
| 776U  | .....                                                                                      | 2970 |
| M252A | .....                                                                                      | 2970 |

|       |                                                                                                                                                                                                                 |      |   |   |   |   |   |   |   |   |   |   |   |  |
|-------|-----------------------------------------------------------------------------------------------------------------------------------------------------------------------------------------------------------------|------|---|---|---|---|---|---|---|---|---|---|---|--|
| 761U  | TGTAAGTATTCTGTGCACAAATAATGTACCAAAAATGTGGTTCCTCCAAATACTTAGACTGGGCTAGTGATCCTTATTC                                                                                                                                 | 3060 |   |   |   |   |   |   |   |   |   |   |   |  |
| 776U  | .....T.....                                                                                                                                                                                                     | 3060 |   |   |   |   |   |   |   |   |   |   |   |  |
| M252A | .....C.....G.....T.....C.....                                                                                                                                                                                   | 3060 |   |   |   |   |   |   |   |   |   |   |   |  |
| 761U  | TATAGCCAAAGTATGACCAAGGTTTAAAAAATGTAACGCAAGATATGTACTTATGCATAGTCCCAA                                                                                                                                              | 3150 |   |   |   |   |   |   |   |   |   |   |   |  |
| 776U  | .....C.....A.....C.....T.....                                                                                                                                                                                   | 3150 |   |   |   |   |   |   |   |   |   |   |   |  |
| M252A | .....C.....A.....C.....T.....                                                                                                                                                                                   | 3150 |   |   |   |   |   |   |   |   |   |   |   |  |
| 761U  | CATGAAAAGTCTCAGGAAGAAGATGAAATCCTTGCTGAGTTTCTGTAGACCGACACTTAATAATCCCTAGAGCAGCACACGAG                                                                                                                             | 3240 |   |   |   |   |   |   |   |   |   |   |   |  |
| 776U  | .....A.....A.....A.....A.....                                                                                                                                                                                   | 3240 |   |   |   |   |   |   |   |   |   |   |   |  |
| M252A | .....A.....A.....A.....A.....                                                                                                                                                                                   | 3240 |   |   |   |   |   |   |   |   |   |   |   |  |
| 761U  | TCAAATTCAGTACAGGTGCTAGAGAATCTATAGCAGGTATGCTTGACACTACTAAGGGTTTAATCCGTGCTAGTATGTCAAGAGGTGGG                                                                                                                       | 3330 |   |   |   |   |   |   |   |   |   |   |   |  |
| 776U  | .....C.....G.....                                                                                                                                                                                               | 3330 |   |   |   |   |   |   |   |   |   |   |   |  |
| M252A | .....G.....G.....                                                                                                                                                                                               | 3330 |   |   |   |   |   |   |   |   |   |   |   |  |
| 761U  | TTGACCTCATACTTGTTTTAAAATTATCAACATATGATACCAACAGTTAGAACATGTCTTGAATGGCTTTATGCTCCT                                                                                                                                  | 3420 |   |   |   |   |   |   |   |   |   |   |   |  |
| 776U  | .....A.....A.....C.....G.....                                                                                                                                                                                   | 3420 |   |   |   |   |   |   |   |   |   |   |   |  |
| M252A | C.....A.....A.....C.....G.....                                                                                                                                                                                  | 3420 |   |   |   |   |   |   |   |   |   |   |   |  |
|       | <table border="1"> <tr><td>A</td><td>C</td></tr> <tr><td>T</td><td>.</td></tr> <tr><td>.</td><td>.</td></tr> <tr><td>T</td><td>.</td></tr> <tr><td>T</td><td>C</td></tr> <tr><td>I</td><td>.</td></tr> </table> | A    | C | T | . | . | . | T | . | T | C | I | . |  |
| A     | C                                                                                                                                                                                                               |      |   |   |   |   |   |   |   |   |   |   |   |  |
| T     | .                                                                                                                                                                                                               |      |   |   |   |   |   |   |   |   |   |   |   |  |
| .     | .                                                                                                                                                                                                               |      |   |   |   |   |   |   |   |   |   |   |   |  |
| T     | .                                                                                                                                                                                                               |      |   |   |   |   |   |   |   |   |   |   |   |  |
| T     | C                                                                                                                                                                                                               |      |   |   |   |   |   |   |   |   |   |   |   |  |
| I     | .                                                                                                                                                                                                               |      |   |   |   |   |   |   |   |   |   |   |   |  |
| 761U  | ATTGCTGTAAGCGTTGATTCTTGCTCTGTATTCTTAGCTAAGACCATCCGGAAGAGAATGTGGGTTCACTAAAGGAAGGGAGATT                                                                                                                           | 3510 |   |   |   |   |   |   |   |   |   |   |   |  |
| 776U  | .....T.....A.....T.....G.....                                                                                                                                                                                   | 3510 |   |   |   |   |   |   |   |   |   |   |   |  |
| M252A | .....T.....A.....T.....G.....                                                                                                                                                                                   | 3510 |   |   |   |   |   |   |   |   |   |   |   |  |
| 761U  | TATGGGTTAGAAGTACCTGACATTTTGAATGTATGCAAAACAATATTATTGTTGATCACGAAGATTGTTACTCATGTATTCAAGGATCA                                                                                                                       | 3600 |   |   |   |   |   |   |   |   |   |   |   |  |
| 776U  | .....A.....A.....A.....A.....A.....T.....                                                                                                                                                                       | 3600 |   |   |   |   |   |   |   |   |   |   |   |  |
| M252A | ..C.....G.....G.....C.....A.....A.....T.....                                                                                                                                                                    | 3600 |   |   |   |   |   |   |   |   |   |   |   |  |
|       | <table border="1"> <tr><td>G</td><td>T</td></tr> <tr><td>V</td><td>.</td></tr> <tr><td>.</td><td>.</td></tr> <tr><td>V</td><td>.</td></tr> <tr><td>.</td><td>.</td></tr> <tr><td>I</td><td>.</td></tr> </table> | G    | T | V | . | . | . | V | . | . | . | I | . |  |
| G     | T                                                                                                                                                                                                               |      |   |   |   |   |   |   |   |   |   |   |   |  |
| V     | .                                                                                                                                                                                                               |      |   |   |   |   |   |   |   |   |   |   |   |  |
| .     | .                                                                                                                                                                                                               |      |   |   |   |   |   |   |   |   |   |   |   |  |
| V     | .                                                                                                                                                                                                               |      |   |   |   |   |   |   |   |   |   |   |   |  |
| .     | .                                                                                                                                                                                                               |      |   |   |   |   |   |   |   |   |   |   |   |  |
| I     | .                                                                                                                                                                                                               |      |   |   |   |   |   |   |   |   |   |   |   |  |
| 761U  | AGATATTATACATGGTTTTTTGTACCTTCAAATGTCAACTCGATCAATAAATAAGTCAACAAATCTCTCCGAGTACCTTATGTTGGA                                                                                                                         | 3690 |   |   |   |   |   |   |   |   |   |   |   |  |
| 776U  | .....A.....G.....                                                                                                                                                                                               | 3690 |   |   |   |   |   |   |   |   |   |   |   |  |
| M252A | .....A.....G.....                                                                                                                                                                                               | 3690 |   |   |   |   |   |   |   |   |   |   |   |  |
|       | <table border="1"> <tr><td>A</td><td>G</td></tr> <tr><td>R</td><td>.</td></tr> <tr><td>.</td><td>.</td></tr> <tr><td>R</td><td>.</td></tr> <tr><td>A</td><td>.</td></tr> <tr><td>K</td><td>.</td></tr> </table> | A    | G | R | . | . | . | R | . | A | . | K | . |  |
| A     | G                                                                                                                                                                                                               |      |   |   |   |   |   |   |   |   |   |   |   |  |
| R     | .                                                                                                                                                                                                               |      |   |   |   |   |   |   |   |   |   |   |   |  |
| .     | .                                                                                                                                                                                                               |      |   |   |   |   |   |   |   |   |   |   |   |  |
| R     | .                                                                                                                                                                                                               |      |   |   |   |   |   |   |   |   |   |   |   |  |
| A     | .                                                                                                                                                                                                               |      |   |   |   |   |   |   |   |   |   |   |   |  |
| K     | .                                                                                                                                                                                                               |      |   |   |   |   |   |   |   |   |   |   |   |  |
| 761U  | TCAACAACCTGAAGAAAGGAGTGATATGAAGTTGTCATATGTGAGGTCACCTAGTCGGCCACTTAAAGCAGCAGTTCGAATTGCAGCAGTA                                                                                                                     | 3780 |   |   |   |   |   |   |   |   |   |   |   |  |
| 776U  | .....A.....A.....A.....A.....G.....                                                                                                                                                                             | 3780 |   |   |   |   |   |   |   |   |   |   |   |  |
| M252A | .....A.....A.....A.....C.....                                                                                                                                                                                   | 3780 |   |   |   |   |   |   |   |   |   |   |   |  |
| 761U  | TATACATGGGCTTATGGTATGATGATTTGCTCTTGGCATGAACTTGGTATTTAGCAAGGACTAGAGCAAAATATTACTTTTGACGAACTC                                                                                                                      | 3870 |   |   |   |   |   |   |   |   |   |   |   |  |
| 776U  | .....A.....C.....G.....G.....G.....A.....T.....                                                                                                                                                                 | 3870 |   |   |   |   |   |   |   |   |   |   |   |  |
| M252A | .....G.....A.....C.....G.....G.....G.....A.....T.....                                                                                                                                                           | 3870 |   |   |   |   |   |   |   |   |   |   |   |  |
|       | <table border="1"> <tr><td>A</td><td>A</td></tr> <tr><td>N</td><td>T</td></tr> <tr><td>.</td><td>T</td></tr> <tr><td>N</td><td>T</td></tr> <tr><td>G</td><td>A</td></tr> <tr><td>D</td><td>C</td></tr> </table> | A    | A | N | T | . | T | N | T | G | A | D | C |  |
| A     | A                                                                                                                                                                                                               |      |   |   |   |   |   |   |   |   |   |   |   |  |
| N     | T                                                                                                                                                                                                               |      |   |   |   |   |   |   |   |   |   |   |   |  |
| .     | T                                                                                                                                                                                                               |      |   |   |   |   |   |   |   |   |   |   |   |  |
| N     | T                                                                                                                                                                                                               |      |   |   |   |   |   |   |   |   |   |   |   |  |
| G     | A                                                                                                                                                                                                               |      |   |   |   |   |   |   |   |   |   |   |   |  |
| D     | C                                                                                                                                                                                                               |      |   |   |   |   |   |   |   |   |   |   |   |  |
| 761U  | AAATTAATAACACCTATAGCTACATCTACAATTTAGCACATAGATTGAGAGATAGAAGCACTCAAGTTAAATATTCAGGA                                                                                                                                | 3960 |   |   |   |   |   |   |   |   |   |   |   |  |
| 776U  | .....C.....G.....G.....T.....G.....C.....                                                                                                                                                                       | 3960 |   |   |   |   |   |   |   |   |   |   |   |  |
| M252A | .....T.....G.....G.....T.....G.....C.....                                                                                                                                                                       | 3960 |   |   |   |   |   |   |   |   |   |   |   |  |

|       |                                                                                          |                          |                    |               |                   |                                               |      |           |      |
|-------|------------------------------------------------------------------------------------------|--------------------------|--------------------|---------------|-------------------|-----------------------------------------------|------|-----------|------|
| 761U  | GTAAGAGTGGCAGCTATAACAACATATCTAATGATAATATGTCGTTC                                          | ATT                      | ATTAAT             | AAC           | AAA               | AAAGTCGATACTAATTTGTCTACCAG                    | 4050 |           |      |
| 776U  | .....                                                                                    | I                        | .....              | .....         | K                 | .....                                         | 4050 |           |      |
| M252A | .....                                                                                    | I                        | .....              | .....         | K                 | .....                                         | 4050 |           |      |
|       |                                                                                          | T                        |                    |               | R                 |                                               |      |           |      |
| 761U  | CAAGGAATGTTATTAGGTTTGAGTATATTAGAATATATATTCAGATACTGTACAAGTACTGGACAGTCAAACTGTAATTCACTTACAT |                          |                    |               |                   |                                               | 4140 |           |      |
| 776U  | .....                                                                                    |                          |                    |               |                   |                                               | 4140 |           |      |
| M252A | .....                                                                                    |                          |                    |               |                   |                                               | 4140 |           |      |
| 761U  | GCAGATGTTAATTGTTGTATAGTACAGATGACTGATCAGCCTTATACACCAAGCTTAACA                             | AAA                      | AAGCTACCTGATATT    | AGG           | CCCATTAAT         |                                               | 4230 |           |      |
| 776U  | .....                                                                                    | R                        | .....              | A             | .....             |                                               | 4230 |           |      |
| M252A | .....                                                                                    | K                        | .....              | AA            | .....             |                                               | 4230 |           |      |
|       |                                                                                          | K                        |                    | K             |                   |                                               |      |           |      |
| 761U  | AATAAACTGATATATGATCCGGCTCCTATAATCGATACGATGCAGCTAGGCTATATCC                               | CAAAA                    | ATAGCTGT           | CACAT         | TAATAGATTT        | C                                             | 4320 |           |      |
| 776U  | .....                                                                                    |                          |                    |               |                   |                                               | 4320 |           |      |
| M252A | .....                                                                                    |                          |                    |               |                   |                                               | 4320 |           |      |
| 761U  | CCAAGTTGGTCAACTACTCAGCTTAACACAGTGTGGCGAAAGTGGTGGCGGTATC                                  | CAT                      | TGTAGA             | ATTAAT        | TACAAAAGT         | TAGTAAAGAC                                    | 4410 |           |      |
| 776U  | .....                                                                                    |                          |                    |               |                   |                                               | 4410 |           |      |
| M252A | .....                                                                                    |                          |                    |               |                   |                                               | 4410 |           |      |
| 761U  | CATCTCAATGAGATAATAGCAGTTGTTGGTGATGATGATATCAATAGCTTTATTACAGA                              | ATTTCTACTT               | GTGATCCACGT        | CTGTTTACA     |                   |                                               | 4500 |           |      |
| 776U  | .....                                                                                    |                          |                    |               |                   |                                               | 4500 |           |      |
| M252A | .....                                                                                    |                          |                    |               |                   |                                               | 4500 |           |      |
| 761U  | CTATATTTAGGCCAATAC                                                                       | ACA                      | TCATTACA           | ATGGGCATATGAA | GTC               | CATTATCATAGACCAGTGGGTAAATACCAGATGGCTGAAGTGTTC | 4590 |           |      |
| 776U  | .....                                                                                    | T                        | .....              | .....         | V                 | .....                                         | 4590 |           |      |
| M252A | .....                                                                                    | T                        | .....              | .....         | V                 | .....                                         | 4590 |           |      |
|       |                                                                                          | M                        |                    |               | I                 |                                               |      |           |      |
| 761U  | CATAATTTGCTGTCAAGAGCTAGTAGAGTATATTCAGCATATTTGACCAATGCCTTTAGCCAC                          | CCCAGAGTCTAC             | AAAAGATTCTGGGAG    |               |                   |                                               | 4680 |           |      |
| 776U  | .....                                                                                    |                          |                    |               |                   |                                               | 4680 |           |      |
| M252A | .....                                                                                    |                          |                    |               |                   |                                               | 4680 |           |      |
| 761U  | TGTGTTTATGAGCCTATTTATGGGCC                                                               | TATATAGGAAGTCAAAATCTACAT | AAT                | GCA           | ATG               | ATTGATTATATCTATAATGCATAC                      | ATT  | 4770      |      |
| 776U  | .....                                                                                    |                          | N                  | .....         | M                 | .....                                         | I    | 4770      |      |
| M252A | .....                                                                                    |                          | N                  | .....         | M                 | .....                                         | I    | 4770      |      |
|       |                                                                                          |                          | S                  |               | V                 |                                               | L    |           |      |
| 761U  | ACTTATTTGGATGCTTATTTATCTGATCAAGTAGATGATACTGATATTATAATA                                   | TGTGAAACAGAGGAGACATGTTT  | GCCGAAT            | CGAATT        |                   |                                               | 4860 |           |      |
| 776U  | .....                                                                                    |                          |                    |               |                   |                                               | 4860 |           |      |
| M252A | .....                                                                                    |                          |                    |               |                   |                                               | 4860 |           |      |
| 761U  | GACAATTA                                                                                 | CAAAGCAGACACT            | TAGCTGTCTTATAGATCT | TGAT          | TGTGATTCCACTAGATG | CCCAATATAAAAGGG                               | GCA  | GATACAATT | 4950 |
| 776U  | .....                                                                                    |                          |                    |               |                   |                                               | A    | .....     | 4950 |
| M252A | .....                                                                                    |                          |                    |               |                   |                                               | A    | .....     | 4950 |
|       |                                                                                          |                          |                    |               |                   |                                               | S    |           |      |





|       |                                        |                             |            |                                |                                             |        |                |       |                   |              |        |      |
|-------|----------------------------------------|-----------------------------|------------|--------------------------------|---------------------------------------------|--------|----------------|-------|-------------------|--------------|--------|------|
| 761U  | AATACAAATCGATTGATTGAT                  | CCTGATAGAAATAGTACAATACATA   | GTT        | AGAAATTTACAACCA                | ACTCCAGTTACATTTTT                           | GTCCAT | TATT           | 6030  |                   |              |        |      |
| 776U  | .....                                  | .....                       | V          | .....                          | .....                                       | .....  | .....          | 6030  |                   |              |        |      |
| M252A | .....                                  | C                           | A          | .....                          | T                                           | .....  | A              | 6030  |                   |              |        |      |
|       |                                        |                             | I          |                                |                                             |        | C              |       |                   |              |        |      |
|       |                                        |                             | A          |                                |                                             |        | I              |       |                   |              |        |      |
|       |                                        |                             | I          |                                |                                             |        |                |       |                   |              |        |      |
| 761U  | TTTGAAACTAAGTATAGA                     | AAATAATATGGTTACAAATTATGGACT | GT         | TGCTTGT                        | CAGACGGACACAAAAGTGATTAC                     | CT     | TGTCATCAATTACA | 6120  |                   |              |        |      |
| 776U  | .....                                  | .....                       | .....      | .....                          | .....                                       | .....  | .....          | 6120  |                   |              |        |      |
| M252A | .....                                  | C                           | .....      | A                              | .....                                       | T      | .....          | 6120  |                   |              |        |      |
| 761U  | AAAATAGAG                              | AAC                         | GTTCTT     | CTGTCATGTGGGTTAGAATTGAA        | TGGACCTAAGATTATACAGCAATTATCAGGACATGACTATGCT | AAT    | GGG            | 6210  |                   |              |        |      |
| 776U  | .....                                  | N                           | .....      | .....                          | .....                                       | .....  | .....          | 6210  |                   |              |        |      |
| M252A | .....                                  | T                           | .....      | .....                          | .....                                       | .....  | .....          | 6210  |                   |              |        |      |
|       |                                        | N                           |            |                                |                                             |        |                |       |                   |              |        |      |
|       |                                        | N                           |            |                                |                                             |        |                |       |                   |              |        |      |
|       |                                        | GT                          |            |                                |                                             |        |                |       |                   |              |        |      |
|       |                                        | S                           |            |                                |                                             |        |                |       |                   |              |        |      |
| 761U  | GAGACTAGTCTAGAATCAAGTATAATGATATTAGTTAG | A                           | GAAATATCTT | AATGCAACTATACA                 | AGGCCGGGAAACATTAGGCTT                       | TTTTCA |                | 6300  |                   |              |        |      |
| 776U  | .....                                  | .....                       | .....      | .....                          | .....                                       | .....  | .....          | 6300  |                   |              |        |      |
| M252A | .....                                  | G                           | .....      | .....                          | .....                                       | .....  | .....          | 6300  |                   |              |        |      |
| 761U  | CCTTACCC                               | AGTCTT                      | A          | CATGAGAGTCAGTTAAGAGAA          | AATTAATAAGTGATT                             | GCA    | TTGAAATAT      | GTT   | GTATATCTA         | CTCTTTTATTCA | AGC    | 6390 |
| 776U  | .....                                  | .....                       | .....      | .....                          | .....                                       | .....  | .....          | ..... | .....             | .....        | .....  | 6390 |
| M252A | .....                                  | G                           | C          | T                              | .....                                       | .....  | .....          | G     | .....             | .....        | .....  | 6390 |
|       |                                        | A                           |            |                                |                                             |        |                | V     |                   |              |        |      |
|       |                                        | A                           |            |                                |                                             |        |                | V     |                   |              |        |      |
|       |                                        | T                           |            |                                |                                             |        |                | I     |                   |              |        |      |
|       |                                        | V                           |            |                                |                                             |        |                |       |                   |              |        |      |
| 761U  | TCTACATTATCTAGTAAACAAATAATGAGTAATCT    | T                           | TAGAAAG    | GGAAATATTGATGTATGATTGAGAGATGAA | TTTTTCATATCAAGATTG                          |        |                | 6480  |                   |              |        |      |
| 776U  | .....                                  | .....                       | .....      | .....                          | .....                                       | .....  | .....          | 6480  |                   |              |        |      |
| M252A | .....                                  | .....                       | .....      | .....                          | .....                                       | .....  | .....          | 6480  |                   |              |        |      |
| 761U  | TCAGCAAATTACAAGAAAAAG                  | GGT                         | GATGTCACA  | AGAAGT                         | CAAACTACCTGGAT                              | CTT    | TAAT           | CTT   | GATACTCCGACACGAAA | AGCA         | TTATAT | 6570 |
| 776U  | .....                                  | .....                       | .....      | .....                          | .....                                       | .....  | .....          | ..... | .....             | .....        | .....  | 6570 |
| M252A | .....                                  | .....                       | A          | A                              | .....                                       | .....  | .....          | ..... | .....             | .....        | .....  | 6570 |
|       |                                        |                             | G          |                                |                                             |        |                |       |                   |              |        |      |
|       |                                        |                             | T          |                                |                                             |        |                |       |                   |              |        |      |
|       |                                        |                             | G          |                                |                                             |        |                |       |                   |              |        |      |
|       |                                        |                             | A          |                                |                                             |        |                |       |                   |              |        |      |
|       |                                        |                             | I          |                                |                                             |        |                |       |                   |              |        |      |
| 761U  | AAGTTAGTAGGTTA                         | TTCATTAATAATTAATCAT         | GTA        | TGA                            |                                             |        |                | 6609  |                   |              |        |      |
| 776U  | .....                                  | .....                       | V          | .....                          | .....                                       | .....  | .....          | 6609  |                   |              |        |      |
| M252A | .....                                  | .....                       | .....      | .....                          | .....                                       | .....  | .....          | 6609  |                   |              |        |      |
|       |                                        |                             | V          |                                |                                             |        |                |       |                   |              |        |      |
|       |                                        |                             | A          |                                |                                             |        |                |       |                   |              |        |      |
|       |                                        |                             | I          |                                |                                             |        |                |       |                   |              |        |      |
