# Supplementary material
Source: PubMed Central journal article supplement (PMC3325679)
Supplement: 1119972109_sfig04.pdf [file 1119972109_sfig04.pdf]

SI Fig. 4

| MA (S, T) L |                                                                                                           |                                                                                           |                                                                    |
|-------------|-----------------------------------------------------------------------------------------------------------|-------------------------------------------------------------------------------------------|--------------------------------------------------------------------|
| 761U        | MSSILRSLAAF                                                                                               | KRHREQPTAPSGSGGAIKGLKNTIIVPVPDGTVITTRSNLLFRLVYIIGNPDTPLSTSTGAIISLLTLFVESPGQLIQRIADDPDAVFK | 100                                                                |
| 776U        | .....                                                                                                     | .....T.....                                                                               | 100                                                                |
| M252A       | .....K.....                                                                                               | .....T.....                                                                               | 100                                                                |
| CdiPV       | A..K..TL..                                                                                                | T.D..PLA.....R.I.HV..LI..SS.V..R..D..RLV.D.KINGPKL..IL..I.S.....I...VSI                   | 100                                                                |
| DmoPV       | .AT.....L..                                                                                               | NKDRTPLIA.....R.I.HV.V.....SS.V..R..D..RLA.D.YISGPKL..VM..I.S.....S.....T...VSIR          | 100                                                                |
| MeaPV       | .AT.....L..                                                                                               | NKDK.PIT.....R.I.HI...I..SS.....R..D..RL.....VSGPKL..L.GI.S.....T...VSIR                  | 100                                                                |
| PprPV       | .AT..K...L..                                                                                              | NKDKAPTA.....R.I..V...I..SS.I..R..D..RLA.D..ING.KL..VM..M.S.....T...VSIR                  | 100                                                                |
| RinPV       | A..K...L..                                                                                                | AKDK.PLAA.....R.I.HV.V..I..SS.....R..D..K.MV.D..ISGPKL..L..I.S.....T...ISI                | 100                                                                |
| PdiPV       | A..K..SL..                                                                                                | KT.....PLA.....R.I.HV..LI..SS.V..R..D..RMV.D.EVSGPKL..VL..I.S.....I...ISI                 | 100                                                                |
|             |                                                                                                           | QxW (I, V) xxxK (A, C) x                                                                  |                                                                    |
| 761U        | LVEVIPEAGNPGELTFASRGINLDKQAQYFKLAEKNQGYVSLGFENPPNDDITSSPEIFNYILASVLAQVWILLAKAVTT                          | APDTAAEAENRRWIKLM                                                                         | 200                                                                |
| 776U        | .....                                                                                                     | .....                                                                                     | 200                                                                |
| M252A       | .....R.....                                                                                               | .....                                                                                     | 200                                                                |
| CdiPV       | .....SINSACG.....AS..SE.DEF..IVDEGSKAQQLGWL..KDIV.IEVDNA.Q..IL..I..I.....                                 | .....DS.M.....YT                                                                          | 200                                                                |
| DmoPV       | .....QSEKSLSG.....A.MEDE.DD..SIQAGEEGDTRGTHW..KEIVEIEVQD..E..IL..I..I.....                                | .....DS.T.....YT                                                                          | 200                                                                |
| MeaPV       | L..VQSDQSQSG.....T.MEDE.D..SHDDPSSSDQSR.GW..KEIS.IEVQD..G..M..GTI..I.V.....                               | .....DS.L.....YT                                                                          | 200                                                                |
| PprPV       | ...VQSTRSQSG.....AD..NE.DM..STEGPSSG.KKRINW..REII.IEVQD..E..ML..I..I.....                                 | .....DS.L..V.YT                                                                           | 200                                                                |
| RinPV       | ...VQSDKTQSG.....TSM.DE.DR..TYE.P..GEERQ.YW..RDIQ.IEIQD..G..M..TI..I.....                                 | .....DS.L..V.YT                                                                           | 200                                                                |
| PdiPV       | .....SINSTCG.....AS..AE.DEF.GTMDEGSKDHNQMGWL..KDII.IEVNDA.Q..IL..I..I.....                                | .....DS.M.....YT                                                                          | 200                                                                |
|             |                                                                                                           | FxxT (I, L) (R, K) Ø (G, A) (L, I, V) x                                                   |                                                                    |
| 761U        | QQRVDGELRLSKGWLDLVRNKIASDITIRRFMVALVDIKRSPGTRPRIAEMICDIDNYIVEAGLAS                                        | FLLTIKFGIET                                                                               | RYPALALHEFSGELATIEGLM 300                                          |
| 776U        | .....                                                                                                     | .....                                                                                     | 300                                                                |
| M252A       | .....                                                                                                     | .....                                                                                     | 300                                                                |
| CdiPV       | ...V..F.MN.I..I..R..E.LSL.....I.....NK.....                                                               | .....I.....M...G.....T...S..                                                              | 300                                                                |
| DmoPV       | ...V..F..D...A..R..E.LSL.....I.....T.NK.....T.....                                                        | .....I.....M...G.....T.V.S..                                                              | 300                                                                |
| MeaPV       | ...V..F..ERK..V..R..E.LSL.....I.....T.NK.....T.....                                                       | .....I.....M...G...A...S.L.S..                                                            | 300                                                                |
| PprPV       | ...I..F..D...A..R..E.LSL.....S.I.....T.NK.....                                                            | .....I.....M...G...A...S...S..                                                            | 300                                                                |
| RinPV       | ...I..F..D...T..RV.E.LSL.....I.....T.NK.....E.E.RDKQTRS..R.PR..--ETP..QL..L..IMPE.EVSRE.GQNPR..AQ..SA..AL | .....I.....M...G...A...S...S..                                                            | 300                                                                |
| PdiPV       | ...I..F.MN.I..I..R..E.LSL.....I.....NK.....                                                               | .....I.....M...G.....T...S..                                                              | 300                                                                |
|             |                                                                                                           | FxxxxYpxxxØSØAMG                                                                          |                                                                    |
| 761U        | KLYQSMGEMAPYMVILENSIQTR                                                                                   | FSAGSYPLLWSYAMG                                                                           | VGVELERSMGGLNFRSFFDPTYFRIGQEMVRRSSGMVNSSFARELGLSDHETQLVVSQIVNS 400 |
| 776U        | .....                                                                                                     | .....                                                                                     | 400                                                                |
| M252A       | .....                                                                                                     | .....                                                                                     | 400                                                                |
| CdiPV       | M...Q...T.....V.NK.....                                                                                   | .....N.....G..Y..A.....A.K.S.AL.A...ITKE.A...E.ASK                                        | 400                                                                |
| DmoPV       | N...Q...T.....NK.....                                                                                     | .....N.....G..Y..A.....A.K.S..L.A...ITAEDAK...E.AAQ                                       | 400                                                                |
| MeaPV       | N...Q...T.....NK.....                                                                                     | .....N.....G..Y..A.....A.K.S.TL.S...ITAEDAR...E.AMH                                       | 400                                                                |
| PprPV       | N...QL..V.....NK.....A.....                                                                               | .....G..N.....G..Y..A.....A.K.S.VI.A...ITAE.AK...E.ASQ                                    | 400                                                                |
| RinPV       | N...Q...L.....NK.....A.....                                                                               | .....I.....N.....G..Y..A.....A.K.S.NL.S...ITEE.AR...E.AAY                                 | 400                                                                |
| PdiPV       | V...Q...T.....V.NK.....                                                                                   | .....N.....G..Y..A.....A.K.S.T..A.F.ITKE.A...E..SR                                        | 400                                                                |
| 761U        | GGESGIPKFDGFRANPTTFLGTKDNINDRGEDQNSNISGLPGPL-LPSRDNLNSGDSYGINSNG--VKNVSDKLNIEGVPDHDVSSAME--ELRRLVEST      | .....D.....-.....D.....--.....--.....                                                     | 495                                                                |
| 776U        | .....                                                                                                     | .....K.....S.V.....THP.....ADD.....N..S..IS.....                                          | 495                                                                |
| M252A       | .....                                                                                                     | .....                                                                                     | 495                                                                |
| CdiPV       | TT.DRTIRAT.PKQSQI..HSERS--EVANQ.PPT.NKRSENQ-GGDKYPIHFS.E--RLP.YTPDVN.SEWS.SRYDTQIQDDGND--DD.KSM.AI        | .....                                                                                     | 493                                                                |
| DmoPV       | ANDDRANRAI.PKQ.QIS..HPDRG--ASTPG---NI.RANE-GDGSTRMKR.GNIATPK.TSIDQT.TT.SKDTLDIDEQ.DNTDDPISIQKSA.AL        | .....                                                                                     | 493                                                                |
| MeaPV       | TT.DR.SRAV.P.QAQVS..HGDS--ENELPGLGGKEDRRV                                                                 | KQ-GRGEARESRET-.SSRASDARAAHPPTSMPL-DIDTA.E.GQDPQDS..SADAL                                 | 495                                                                |
| PprPV       | A.DERTARGT.P.QAQVS..QH.TG--EGESSAPATRE.VKAAIPNG.EERDRKQTRS.RPR.--ETP..QL..L..IMPE.EVSRE.GQNPR..AQ..SA..AL | .....                                                                                     | 495                                                                |
| RinPV       | TSDDRNRTS.PKQSQI..R.DQG--SEAQHSASKKDEARA.Q-VKKETRTS.KSD-KHKE.TDKEP..SS-AMTLIDVDTTLEADTDPL.SKKSA.AL        | .....                                                                                     | 495                                                                |
| PdiPV       | TT.DRTTRAT.PKQSQI..HSER.--EAPNQLRPP.TMKSEFQ-GGDKYS.QLI.D--RL..YTSVQQ.SEWD.SRQITQLTQEGDHD--NDQQSMDGL       | .....                                                                                     | 493                                                                |
| 761U        | NRIDT----KQPEASGVTNH-YNDTDLK                                                                              | .....                                                                                     | 519                                                                |
| 776U        | .....                                                                                                     | .....                                                                                     | 519                                                                |
| M252A       | .....K...P.....R                                                                                          | .....                                                                                     | 519                                                                |
| CdiPV       | AKMRMLTKMLS..GT.EDNSPV.S.KE..N                                                                            | .....                                                                                     | 523                                                                |
| DmoPV       | AKMRAMAKLLENQGPRD..A.V...K...G                                                                            | .....                                                                                     | 523                                                                |
| MeaPV       | L.LQAMAGILEEQGSDTD.PR.V..R..D                                                                             | .....                                                                                     | 525                                                                |
| PprPV       | F.LQAMAKILEDQ.EGEDNSQV...K...G                                                                            | .....                                                                                     | 525                                                                |
| RinPV       | L.LQAMAGILGDSTLGNDSLRA..K..N                                                                              | .....                                                                                     | 525                                                                |
| PdiPV       | AKMRQLTKILN.SDTN.EVSPAH..R...S                                                                            | .....                                                                                     | 523                                                                |
