# Supplementary material
Source: PubMed Central journal article supplement (PMC3325679)

SI Fig. 8

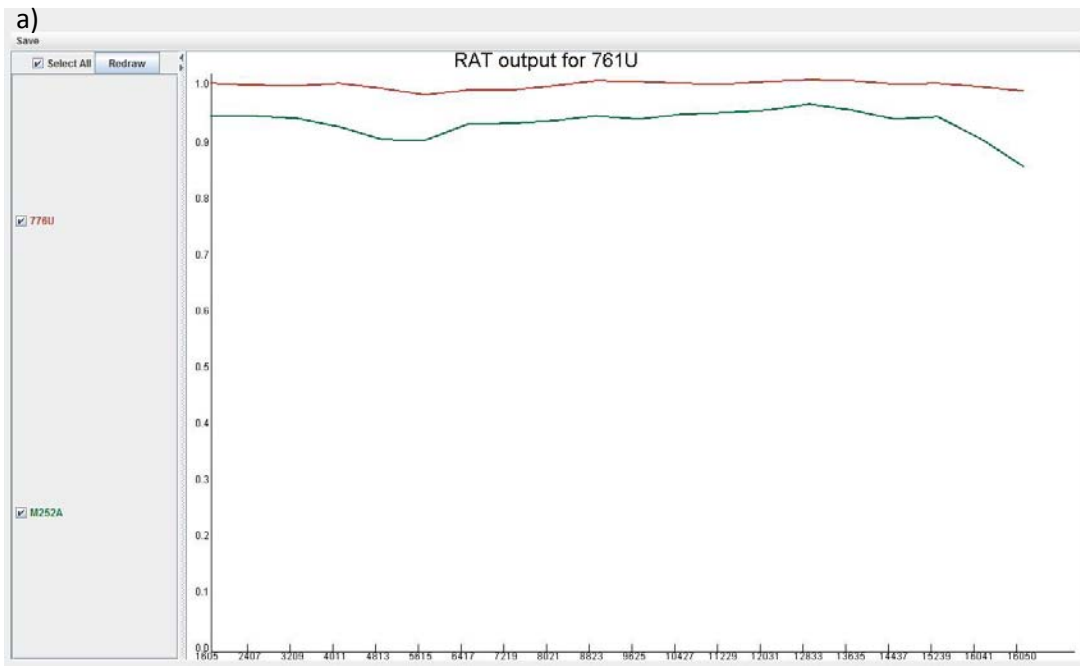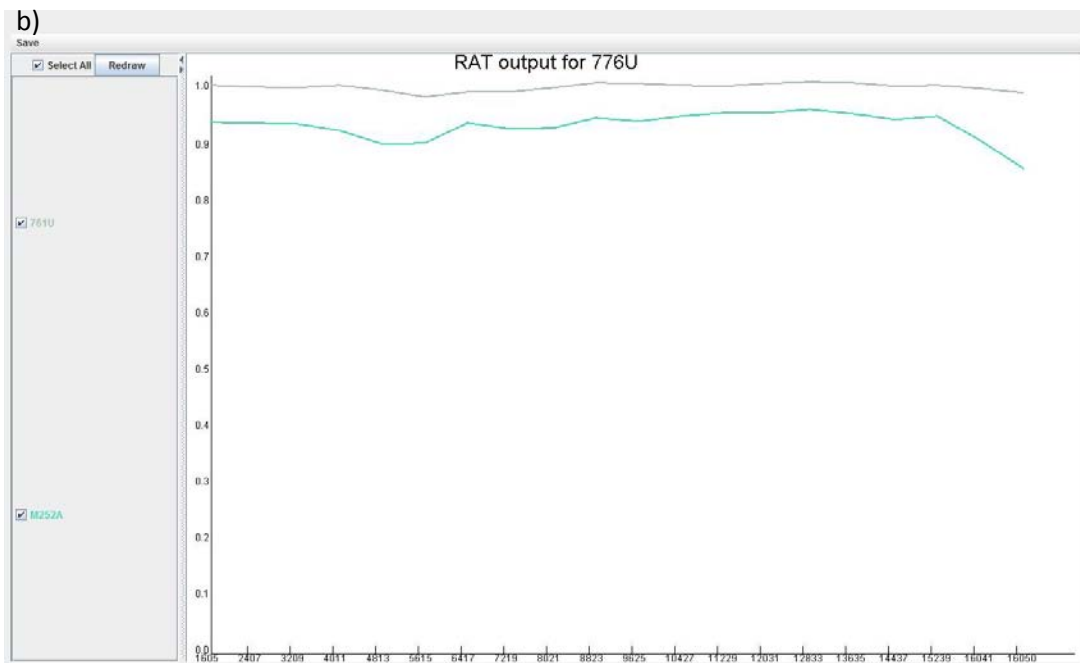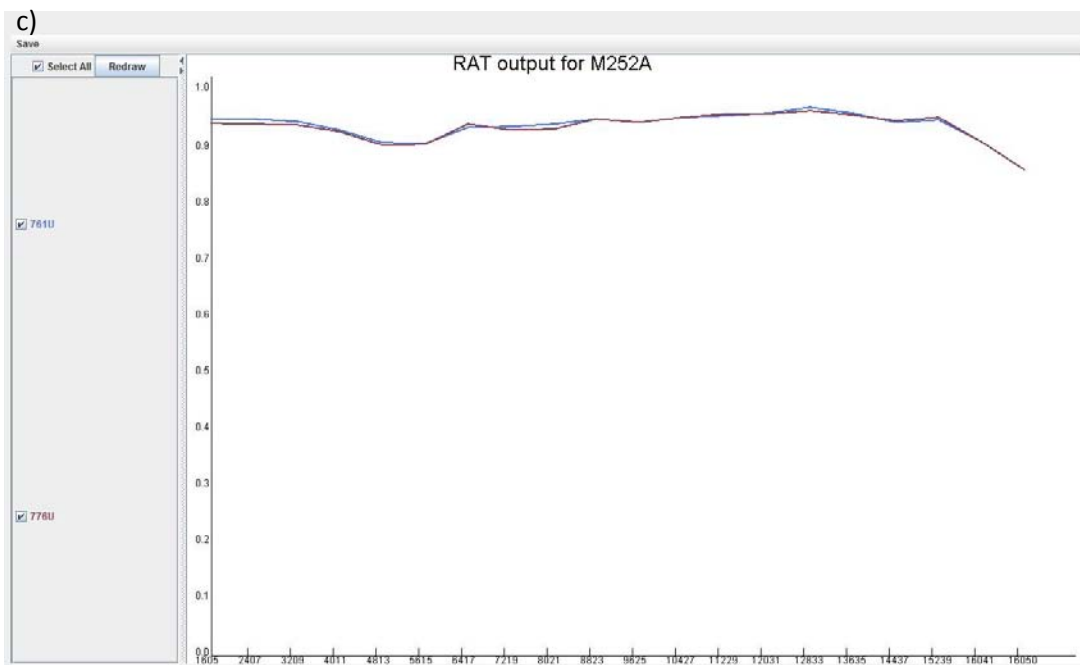

Supplement: 1119972109_sfig08.pdf [file 1119972109_sfig08.pdf]
